# Supplementary material for: pH-responsive supramolecular switch of a rationally designed dipyrroethene-based chromophore
Source: Royal Society of Chemistry journal article supplement (doi:10.1039/d4sc07016j), 2024-12-16
Supplement: d4sc07016j1.pdf [file d4sc07016j1.pdf]

*Supporting Information*  
*for*

**pH-Responsive Supramolecular Switch of Rationally Designed Dipyrroethene-Based Chromospheres**

Debasish Mandal, Abani Sarkar,<sup>+</sup> Kanhu Charan Behera<sup>+</sup> and Mangalampalli Ravikanth\*

<sup>+</sup>These two authors contributed equally

Indian Institute of Technology, Powai, Mumbai, 400076, India.

E-mail: ravikanth@chem.iitb.ac.in; Fax: +91-22-5723480; Tel: +91-22-5767176

| <b>Sl. No.</b> | <b>Contents</b>                                                                                                                    | <b>Page No.</b> |
|----------------|------------------------------------------------------------------------------------------------------------------------------------|-----------------|
| 1.             | Experimental: Materials and methods                                                                                                | S1-S3           |
| 2.             | Synthetic Procedure of all the compound <b>6a</b> , <b>6b</b> , <b>6c</b> and <b>6c+2H<sup>+</sup></b>                             | S3-S5           |
| 3.             | Optimization table for the synthesis of $\alpha$ , $\alpha'$ -diformyl DPE.                                                        | S5              |
| 4.             | ATR-FTIR of compound <b>6c</b> and <b>6c+2H<sup>+</sup></b>                                                                        | S6              |
| 4.             | Solid state absorption emission profile of <b>6c</b>                                                                               | S6              |
| 5.             | pKa determination of <b>6a-6c</b> from the plot of $A_{\max}$ vs pH plot                                                           | S7              |
| 6.             | Protonation of compound <b>6c</b> in the presence of different acids                                                               | S7              |
| 7.             | Quenching of luminescence property in the presence of TFA                                                                          | S8              |
| 8.             | Enhancement of luminescence property in the presence of TEA                                                                        | S9              |
| 9.             | Job's plot                                                                                                                         | S10             |
| 10.            | Crystallographic parameters                                                                                                        | S11-S14         |
| 11.            | ORTEP Diagram                                                                                                                      | S15             |
| 12.            | PXRD plot                                                                                                                          | S16             |
| 13.            | DFT, TD-DFT optimized structure, HOMO-LUMO energy profile and NTO analysis.                                                        | S17-S18         |
| 14.            | Characterization data of compounds <b>5</b> , <b>6a</b> , <b>6b</b> and <b>6c</b> : <sup>1</sup> H, <sup>13</sup> C, COSY and HRMS | S19-S25         |
| 15.            | DFT-optimized XYZ Coordinates                                                                                                      | S26-S35         |
| 16.            | References                                                                                                                         | S35             |

## MATERIALS AND METHODS

### Materials:

The chemicals including pyrrole, trifluoroacetic acid (TFA), Triethyl amine (TEA) benzoyl chloride, etc. were procured from reputable suppliers such as Merck and TCI. Unless otherwise indicated, all additional chemicals utilized in the synthesis were of reagent-grade quality. Zinc dust was activated using HCl and water before use. All the solvents are purchased from commercially available sources and performed proper distillation before use. Column chromatography was conducted using silica gel (100-200 mesh) and basic alumina, ensuring the purity and separation of compounds during the purification process.

### Methods:

- **NMR Spectroscopy:** All the  $^1\text{H}$  and  $^{13}\text{C}$  NMR spectra were recorded in  $\text{CDCl}_3$  on Bruker 400 and 500 MHz instruments at room temperature. The frequencies for the  $^{13}\text{C}$  nucleus are 100.06 and 125.77 MHz for 400 and 500 MHz instruments, respectively. Chemical shifts ( $\delta$ ) are stated in parts per million (ppm) using the residual  $\text{CHCl}_3$  (7.26 ppm for  $^1\text{H}$  and 77.16 ppm for  $^{13}\text{C}$ ). Coupling constants  $J$  are given in Hz. Multiplicities are described as singlet (s), broad signal (br), doublet (d), triplet (t), quartets (q), quintet (quint), and multiplet (m).
- **Steady-state optical spectroscopy:** UV/Vis absorption spectra were recorded on the Shimadzu UV-Vis-NIR 3600 spectrophotometer or JASCO V-670 spectrophotometer. Fluorescence spectra were recorded on a Horiba Fluoromax-4 or Fluorolog-QM spectrofluorometer. All absorption and emission spectra were recorded in 10 mm pathlength quartz cuvettes.
- **HRMS** were recorded with Bruker Maxis impact mass spectrometer using ESI-TOF techniques in positive mode by dissolving the compound in either methanol or acetonitrile.
- **Fluorescence quantum yields** were determined<sup>S1</sup> in each case by comparing the corrected spectrum with that of Rhodamine 6G ( $\Phi = 0.95$ ) in EtOH by taking the area under total emission using the procedure reported earlier.<sup>S2</sup> Excitation and emission slit width are kept at 5 nm, and

neutral filter 2 is used on the excitation side to keep counts in the desired range. The following formula was used to calculate the solution state quantum yield.

$$\Phi_S = \Phi_R \times \frac{I_S}{I_R} \times \frac{A_R}{A_S} \times \left( \frac{\eta_S}{\eta_R} \right)^2$$

$\Phi_S$  = Quantum yield of the sample.

$\Phi_R$  = Quantum yield of reference.

$I_S$  = Integrated fluorescence area of the sample.

$I_R$  = Integrated fluorescence area of the reference.

$A_R$  = Absorbance of the reference at the excitation wavelength.

$A_S$  = Absorbance of the sample at the excitation wavelength.

$\eta_S$  = Refractive index of the sample.

$\eta_R$  = Refractive index of the reference.

**Radiative and non-radiative rate constant** was calculated using the following formula.

$$k_r = \frac{\Phi_f}{\tau} \qquad k_{nr} = \frac{(1 - \Phi_f)}{\tau}$$

$k_r$  = Radiative rate constant

$k_{nr}$  = non-radiative rate constant.

$\tau$  = Fluorescence lifetime

$\Phi_f$  = Fluorescence quantum yield.

- **The exponential decay** curve of compound **6a**, **6b** and **6c** were fitted appropriately with a mono/biexponential equation. The average lifetime ( $\tau_{av}$ ) was calculated following the equations depicted in the literature.<sup>S3</sup>
- **X-Ray Analysis:** Single yellow needle-shaped crystals of **6b** and **6c** were used as supplied. A suitable crystal with dimensions  $0.10 \times 0.20 \times 0.30 \text{ mm}^3$  was selected and mounted on a Bruker APEX-II CCD diffractometer. The crystal was kept at a steady  $T = 150.15 \text{ K}$  during data collection. The structure was solved with the Olex 2. Solve 1.5 (Bourhis et al., 2015) solution program using dual space methods and by using Olex 2 1.5-dev (Dolomanov et al., 2009) as

the graphical interface. The model was refined with olex2. refine 1.5-dev (Bourhis et al., 2015) using full matrix least squares minimization on F2.<sup>S4-S5</sup>

- Quantum chemical calculations (gas phase/vacuum) for ground state energy minimized structures for **6c** and **7** were done employing density functional theory (DFT) in a Gaussian 09W program package.<sup>S6</sup> The ground state structural elucidation involved in optimization using DFT-based Beck-3 Lee Young Parr (B3LYP) functional where 6 311G basis sets were used.<sup>S7</sup>
- To generate the Hirshfeld surfaces, the crystallographic information file (.CIF) was imported into the CrystalExplorer17.5 Program.<sup>[7],[8]</sup> Three-dimensional (3D) Hirshfeld surface maps are generated with dnorm using a red-white-blue colour scheme, where red highlights shorter contacts, white is used for contacts around the rvdW separation, and blue is for longer contacts.

$$d_{norm} = \frac{d_i - r_i^{vdW}}{r_i^{vdW}} + \frac{d_e - r_e^{vdW}}{r_e^{vdW}}$$

Additionally, 2-D fingerprint plots, generated using external ( $d_e$ ) and internal ( $d_i$ ) distances, complement these 3-D surfaces, providing a quantitatively summary of the nature and the type of intermolecular interactions in the crystal.

## SYNTHETIC PROCEDURE

*General procedure for the synthesis of diformylation of dipyrroethenes:* In a round bottom flask equipped with a condenser and nitrogen atmosphere, dimethylformamide (1.5 mmol, 5eq.) was taken and kept under ice-cold conditions. Under the nitrogen bubbling condition, phosphorus oxychloride (1.5 mmol, 5 eq.) was added and stirred for 10 minutes, which led to the formation of gel-like mixture. The reaction mixture was brought back to room temperature and reaction grade 1,2-dichloroethane (DCE, 5 ml) was added and stirred for 20 minutes at room temperature. Again, the reaction mixture was cooled to ice-cold conditions and (*E*)-dipyrroethene (0.3 mmol, 1 eq.) dissolved in 1,2-dichloroethane (5 mL) was added dropwise using a dropping funnel under an N<sub>2</sub> atmosphere. After the addition was over, the reaction mixture was refluxed at 80 °C for 6 hours. The reaction mixture was brought to room temperature, quenched with sodium bicarbonate and a

work-up was done using dichloromethane (CH<sub>2</sub>Cl<sub>2</sub>)-water (50:50). The crude reaction mixture was dried over anhydrous Na<sub>2</sub>SO<sub>4</sub>. The solvent was removed on a rotary evaporator under a high vacuum, and the resulting crude product was purified by silica-gel column chromatography using CH<sub>2</sub>Cl<sub>2</sub> solvent. The solvent was removed to afford the two desired diformylated products in overall 82% yields.

(*E*)-diformyl-dipyrroethenes **5**. mp>350 °C; <sup>1</sup>H NMR (400 MHz, CDCl<sub>3</sub>) δ 2.47 (s, 6H), 5.51 (dd, *J* = 2.6, 4.1 Hz, 2H), 6.64 (dd, *J* = 2.4, 4.2 Hz, 2H), 7.23 (d, *J* = 8.1 Hz, 4H), 7.31 (d, *J* = 7.8 Hz, 4H), 8.26 (s, 2H), 9.28 (s, 2H). <sup>13</sup>C {<sup>1</sup>H} NMR (101 MHz, CDCl<sub>3</sub>) δ 178.33, 139.77, 139.27, 136.07, 132.31, 131.12, 130.45, 129.88, 120.54, 115.30, 21.44. HR-MS (ESI-TOF) *m/z*: [M + H]<sup>+</sup> calcd. for C<sub>26</sub>H<sub>22</sub>N<sub>2</sub>O<sub>2</sub>, 395.1750; found, 395.1750.

General procedure for the synthesis of compounds **6a**, **6b**, and **6c**: Diformyl-dipyrroethene (0.77mmol, 1eq.) and Aniline or *ortho*-substituted aniline (1.92 mmol, 2.5 eq.) was taken in a round-bottom flask and dissolved in reaction grade methanol. A catalytic amount of glacial acetic acid was added and the reaction mixture was refluxed at 65 °C for six hours under a nitrogen atmosphere. The reaction led to the formation of orange precipitation in the reaction mixture. The mixture was brought to ice-cold condition and kept for 30 min. Then the reaction mixture was filtered through the Whatman grade filter paper. The residue was washed multiple times in cold methanol to obtain the pure Schiff base as a solid orange or light orange compound **6a**, **6b**, and **6c** in selectively (*E*)-configuration.

**6a**: (Yield: 62%); mp>350 °C; <sup>1</sup>H NMR (500 MHz, CDCl<sub>3</sub>) δ 2.47 (s, 6H), 5.57 (d, *J* = 3.9 Hz, 2H), 6.37 (d, *J* = 3.9 Hz, 2H), 7.05 (d, *J* = 7.7 Hz, 4H), 7.15 (t, *J* = 7.4 Hz, 2H), 7.30 (t, *J* = 7.4 Hz, 4H), 7.34 (d, *J* = 14.8 Hz, 8H), 8.01 (s, 2H). <sup>13</sup>C NMR {<sup>1</sup>H} (126 MHz, CDCl<sub>3</sub>) δ 29.59, 115.04, 115.95, 120.72, 125.19, 128.93, 129.94, 130.14, 130.84, 131.20, 135.70, 137.11, 138.36, 147.91, 151.46. HR-MS (ESI-TOF) *m/z*: [M + H]<sup>+</sup> calcd. for C<sub>38</sub>H<sub>32</sub>N<sub>4</sub>, 545.2712; found, 545.2711.

**6b**: (Yield: 67%); mp>350 °C; <sup>1</sup>H NMR (400 MHz, CDCl<sub>3</sub>) δ 2.48 (s, 6H), 5.59 (d, *J* = 4.0 Hz, 2H), 6.49 (d, *J* = 4.0 Hz, 2H), 7.01 (m, 4H), 7.35 (s, 8H), 7.62 (m, 2H), 8.39 (m, *J* = 0.9, 1.9, 4.9 Hz,

2H), 8.75 (s, 2H). <sup>13</sup>C NMR {<sup>1</sup>H} (101 MHz, CDCl<sub>3</sub>) δ 21.37, 114.92, 115.44, 115.46, 116.43, 118.20, 126.62, 127.85, 130.00, 130.13, 131.89, 136.79, 137.36, 137.40, 138.24, 141.73, 145.46. HR-MS (ESI-TOF) *m/z*: [M + H]<sup>+</sup> calcd. for C<sub>38</sub>H<sub>34</sub>N<sub>6</sub>, 575.2929; found, 575.2929.

**6c**: (Yield: 73%); mp>350 °C; <sup>1</sup>H NMR (400 MHz, CDCl<sub>3</sub>) δ 2.53 (s, 6H), 5.66 (d, *J* = 3.9 Hz, 2H), 6.42 (d, *J* = 3.9 Hz, 2H), 6.78 (m, 2H), 6.96 (dd, *J* = 1.4, 8.1 Hz, 2H), 7.06 (m, 4H), 7.43 (d, *J* = 1.0 Hz, 8H), 8.19 (s, 2H). <sup>13</sup>C NMR {<sup>1</sup>H} (101 MHz, CDCl<sub>3</sub>) δ 21.24, 114.35, 114.96, 116.14, 116.46, 119.75, 127.52, 129.94, 130.26, 130.63, 131.58, 135.29, 136.85, 138.10, 139.39, 144.73, 151.66. HR-MS (ESI-TOF) *m/z*: [M + H]<sup>+</sup> calcd. for C<sub>38</sub>H<sub>32</sub>N<sub>4</sub>O<sub>2</sub>, 577.2593; found, 577.2592

**6c+2H<sup>+</sup>**: HR-MS (ESI-TOF) *m/z*: [M]<sup>+</sup> calcd. for C<sub>42</sub>H<sub>34</sub>F<sub>6</sub>N<sub>4</sub>O<sub>6</sub>, 804.2293; found, 804.2292

## SUPPORTING FIGURE AND TABLE

**Table S1** Optimization table for the synthesis of *α, α'*-diformyl DPE (**5**).

| <i>S. N</i> | <i>Equivalent of POCl<sub>3</sub></i> | <i>Equivalent of DMF</i> | <i>Temp (°C)</i> | <i>Time (h)</i> | <i>Yield</i> |
|-------------|---------------------------------------|--------------------------|------------------|-----------------|--------------|
| 1.          | 2                                     | 2                        | 65               | 4               | 33%          |
| 2.          | 2                                     | 2                        | 80               | 6               | 45%          |
| <b>3.</b>   | <b>5</b>                              | <b>5</b>                 | <b>80</b>        | <b>6</b>        | <b>82%</b>   |
| 4.          | 5                                     | 5                        | 85               | 8               | 80%          |
| 5.          | 5                                     | 7                        | 85               | 8               | 78%          |
| 6.          | 7                                     | 7                        | 85               | 6               | 75%          |
| 7.          | 7                                     | 7                        | 80               | 4               | 77%          |

\*The reaction was carried out by following the mentioned protocol in the previous section. 1,2 DCE solvent was used for the mentioned reactions in all the time.

## IR-Plot

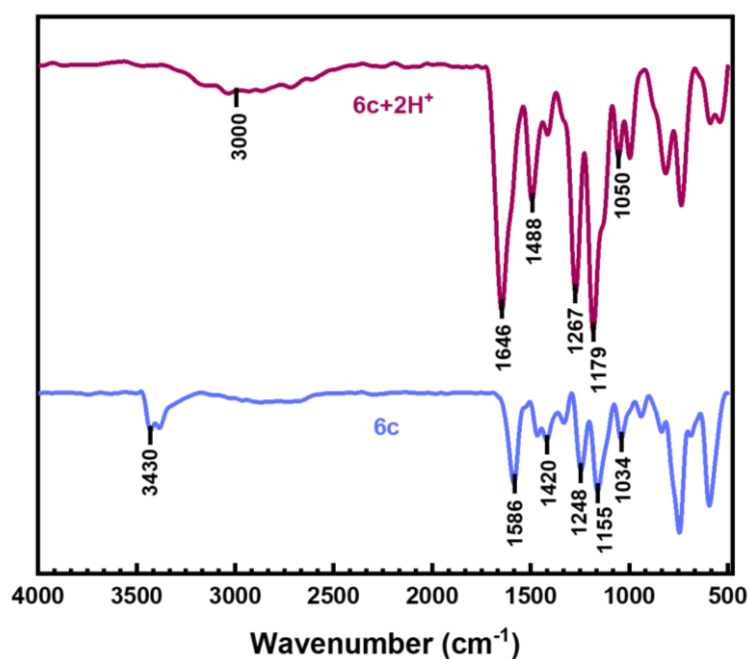

Figure S1 ATR-FTIR of compound **6c** and **6c+2H<sup>+</sup>**

## Excitation Spectra and Solid-State UV-Vis and emission Spectra

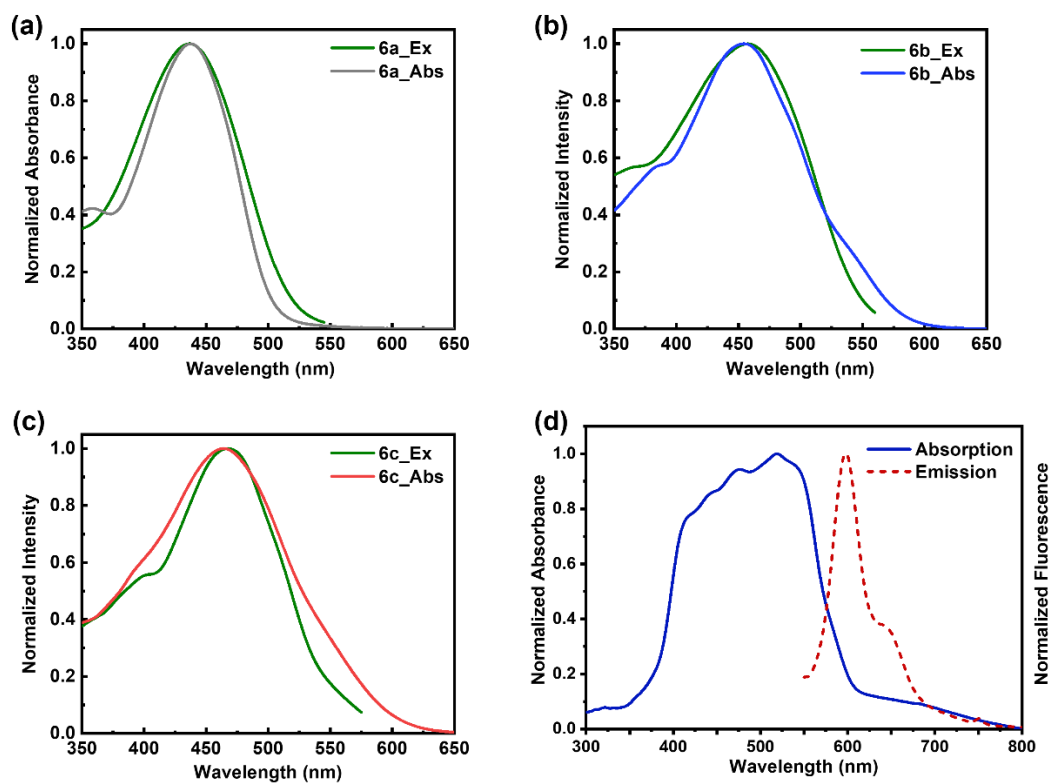

Figure S2 Excitation spectra of (a) **6a**, (b) **6b** and (c) **6c**, (d) solid state UV-Vis and emission spectra of

**6c**

## pKa Determination Plot

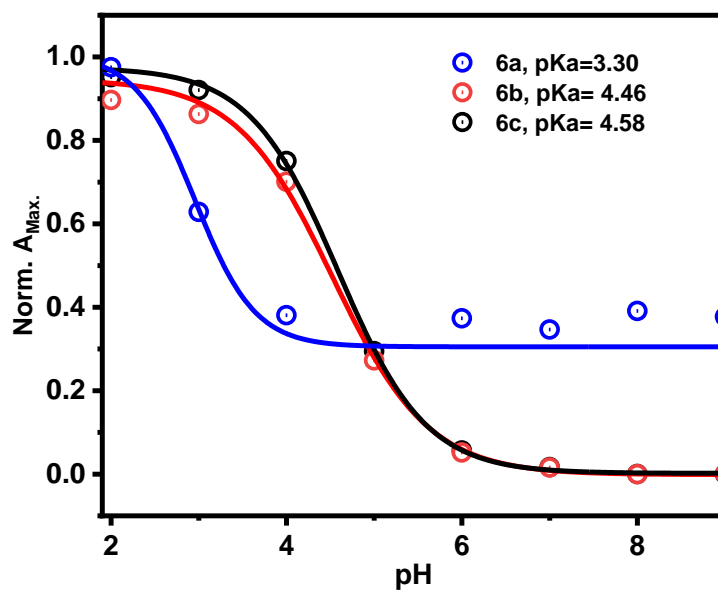

Figure S3 pKa determination of 6a-6c from the plot of  $A_{\max}$  vs pH plot

## UV-Vis Spectra in Presence of Different Acid

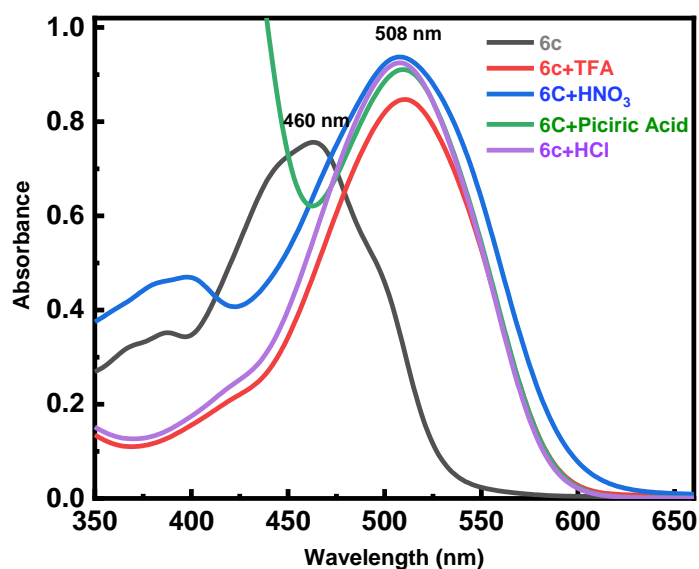

Figure S4 Protonation of compound 6c in the presence of different acids.



## Quenching of luminescence property in presence of TFA

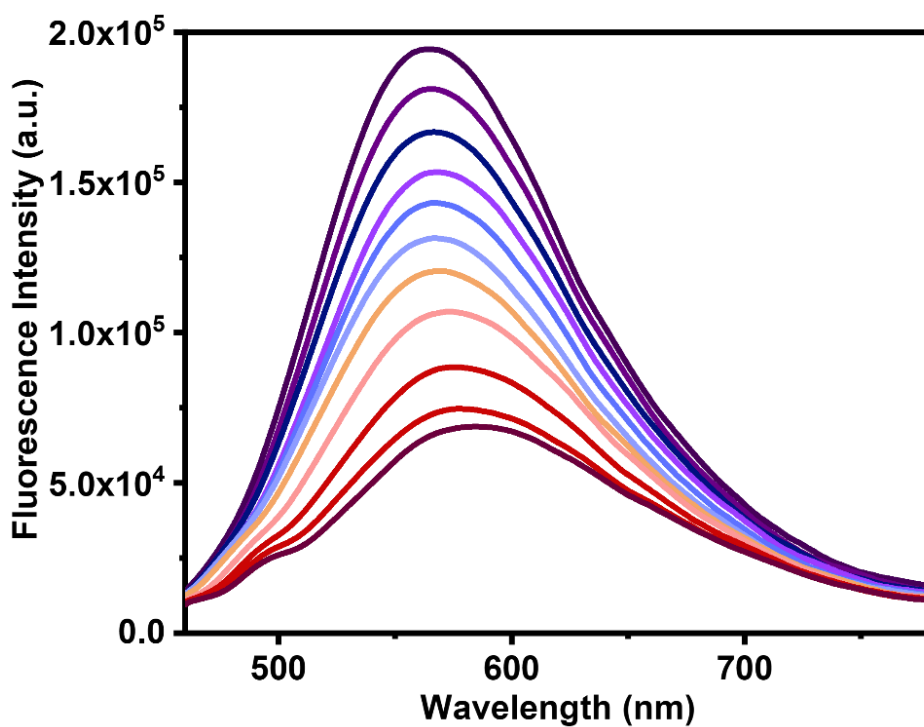

Figure S5 Fluorescence Quenching of molecules 6c in the presence of TFA

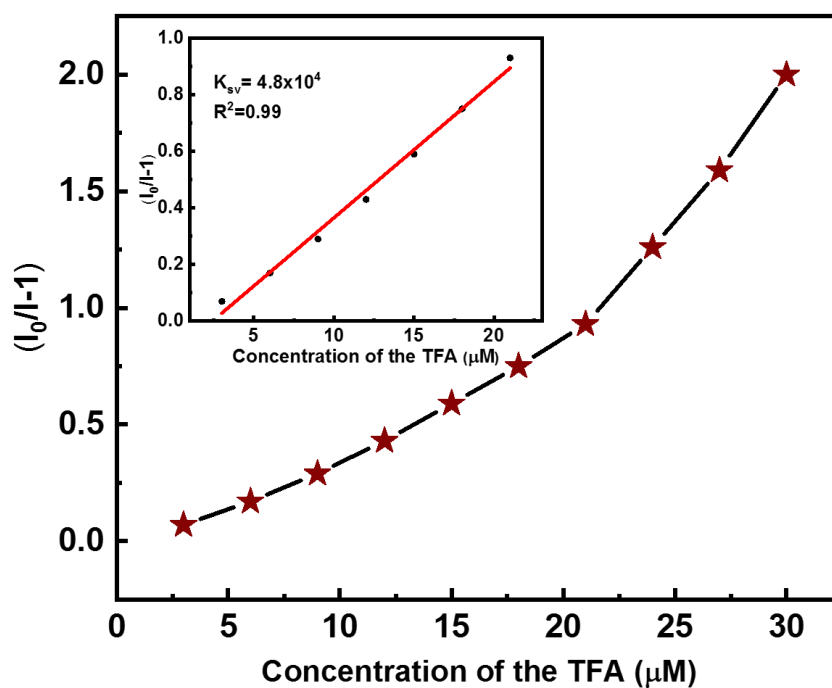

Figure S6 SV-Plot for addition of TFA compound 6c (Inset: Linear fitting within lower concentration region)

## Enhancement of luminescence property in presence of TEA

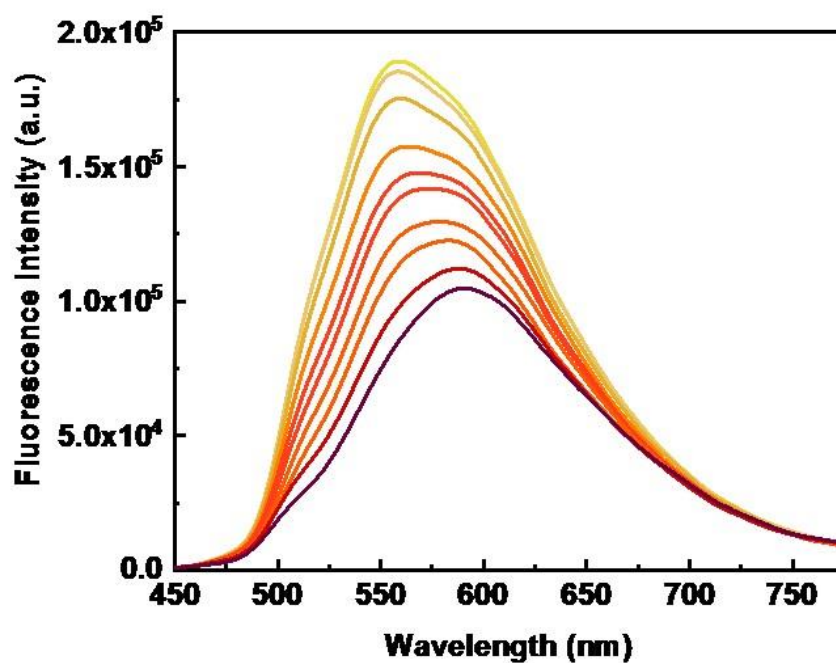

Figure S7 Fluorescence enhancement of molecules  $6c+2H^+$  in the presence of TEA.

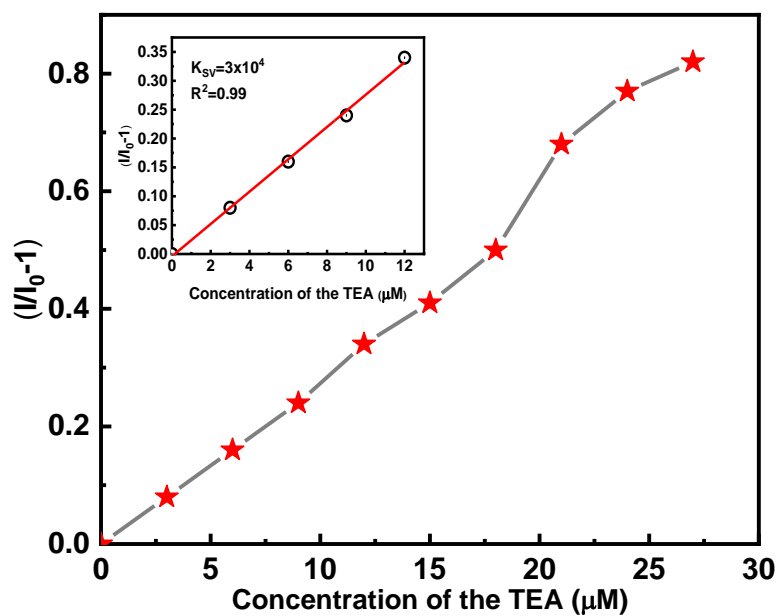

Figure S8 SV-Plot for the addition of TEA compound  $6c+2H^+$  (Inset: Linear fitting within lower concentration region)

### Job's plot

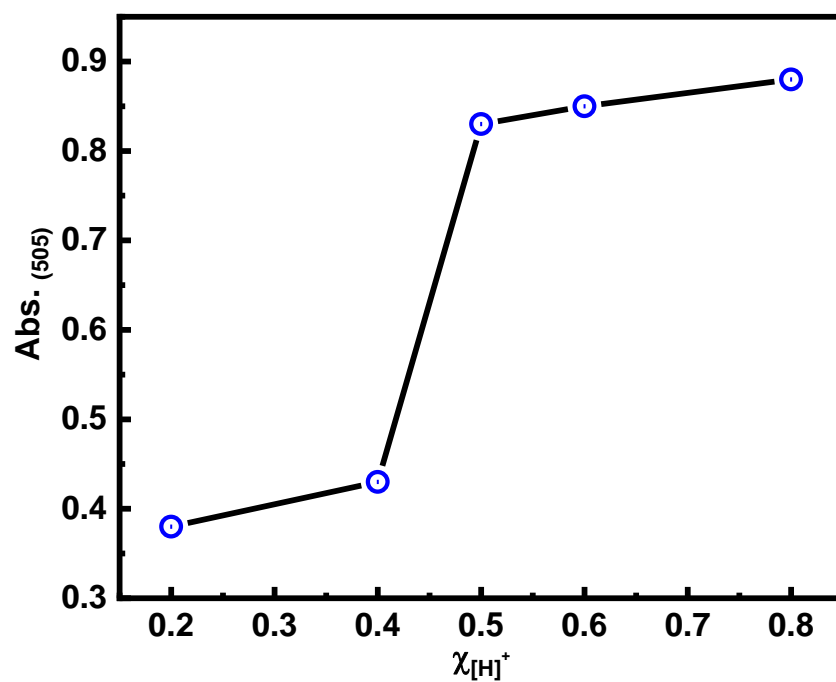

**Figure S9** Job's plot according to the method of continuous variations, indicating the 1:1 stoichiometry for compound  $6\text{c}+2\text{H}^+$

## Crystal table

**Table S2** Crystallographic data and processing parameters of compounds **6b**, **6c**, and **6c+2H<sup>+</sup>**

| Compounds                                   | <b>6b</b>                                                     | <b>6c</b>                                                     | <b>6c+2H<sup>+</sup></b>                                                     |
|---------------------------------------------|---------------------------------------------------------------|---------------------------------------------------------------|------------------------------------------------------------------------------|
| CCDC                                        |                                                               |                                                               |                                                                              |
| Empirical formula                           | C <sub>19</sub> H <sub>17</sub> N <sub>3</sub>                | C <sub>38</sub> H <sub>32</sub> N <sub>4</sub> O <sub>2</sub> | C <sub>50</sub> H <sub>38</sub> F <sub>6</sub> N <sub>4</sub> O <sub>6</sub> |
| Formula weight                              | 287.367                                                       | 576.67                                                        | 804.73                                                                       |
| Temperature/k                               | 105.00                                                        | 150.15                                                        | 150.15                                                                       |
| Crystal system                              | triclinic                                                     | triclinic                                                     | monoclinic                                                                   |
| Space group                                 | P-1                                                           | P-1                                                           | C2/c                                                                         |
| <i>a</i> /Å                                 | 9.295(2)                                                      | 7.2089(7)                                                     | 13.3398(8)                                                                   |
| <i>b</i> /Å                                 | 9.499(2)                                                      | 9.3281(9)                                                     | 12.3038(7)                                                                   |
| <i>c</i> /Å                                 | 10.348(2)                                                     | 11.0857(13)                                                   | 25.4069(13)                                                                  |
| $\alpha$ /°                                 | 79.673(10)                                                    | 97.148(9)                                                     | 90                                                                           |
| $\beta$ /°                                  | 65.183(8)                                                     | 92.220(9)                                                     | 97.608(5)                                                                    |
| $\gamma$ /°                                 | 63.713(9)                                                     | 96.254(8)                                                     | 90                                                                           |
| Volume/Å <sup>3</sup>                       | 743.5(3)                                                      | 734.23(13)                                                    | 4133.3(4)                                                                    |
| Z                                           | 2                                                             | 1                                                             | 4                                                                            |
| $\rho_{\text{calc}}$ /g/cm <sup>3</sup>     | 1.284                                                         | 1.304                                                         | 1.293                                                                        |
| $\mu$ /mm <sup>-1</sup>                     | 0.077                                                         | 0.082                                                         | 0.105                                                                        |
| F(000)                                      | 304.2                                                         | 304.0                                                         | 1872.0                                                                       |
| Crystal size/mm <sup>3</sup>                | 0.2 × 0.01 × 0.01                                             | 0.25 × 0.2 × 0.1                                              | 2.1 × 0.2 × 0.2                                                              |
| Radiation                                   | Mo K $\alpha$ ( $\lambda$ = 0.71073)                          | Mo K $\alpha$ ( $\lambda$ = 0.71073)                          | Mo K $\alpha$ ( $\lambda$ = 0.71073)                                         |
| 2 $\theta$                                  | 4.34 to 50.34                                                 | 3.708 to 50                                                   | 4.94 to 50                                                                   |
| Index ranges                                | -11 ≤ <i>h</i> ≤ 11, -11 ≤ <i>k</i> ≤ 11, -12 ≤ <i>l</i> ≤ 12 | -8 ≤ <i>h</i> ≤ 8, -11 ≤ <i>k</i> ≤ 11, -13 ≤ <i>l</i> ≤ 13   | -15 ≤ <i>h</i> ≤ 15, -14 ≤ <i>k</i> ≤ 14, -30 ≤ <i>l</i> ≤ 30                |
| Reflections collected                       | 19667                                                         | 18304                                                         | 31728                                                                        |
| Independent reflections                     | 2666 [Rint = 0.1581, Rsigma = 0.0960]                         | 2537 [Rint = 0.1144, Rsigma = 0.0564]                         | 3616 [Rint = 0.1083, Rsigma = 0.0665]                                        |
| Data/restraints/parameters                  | 2666/0/219                                                    | 2537/0/201                                                    | 3616/0/264                                                                   |
| Goodness-of-fit F <sup>2</sup>              | 1.099                                                         | 1.071                                                         | 1.059                                                                        |
| Final R indexes [i ≥ 2 $\sigma$ (i)]        | R1 = 0.0586, wR2 = 0.1376                                     | R1 = 0.0874, wR2 = 0.2197                                     | R1 = 0.0740, wR2 = 0.1819                                                    |
| Final R indexes [all data]                  | R1 = 0.1127, wR2 = 0.1736                                     | R1 = 0.1033, wR2 = 0.2307                                     | R1 = 0.1174, wR2 = 0.2075                                                    |
| Largest diff. peak/hole / e Å <sup>-3</sup> | 0.38/-0.39                                                    | 0.41/-0.30                                                    | 0.53/-0.37                                                                   |

## Bond Angle-Bond length Table

**Table S3** Bond Lengths for **6b**.

| Atom            | Atom                        | Length/Å | Atom            | Atom            | Length/Å |
|-----------------|-----------------------------|----------|-----------------|-----------------|----------|
| N <sub>1</sub>  | C <sub>9</sub>              | 1.374(3) | C <sub>6</sub>  | C <sub>7</sub>  | 1.387(4) |
| N <sub>1</sub>  | C <sub>12</sub>             | 1.376(3) | C <sub>10</sub> | C <sub>11</sub> | 1.397(4) |
| N <sub>2</sub>  | C <sub>13</sub>             | 1.281(3) | C <sub>14</sub> | C <sub>15</sub> | 1.419(4) |
| N <sub>2</sub>  | C <sub>14</sub>             | 1.423(3) | C <sub>14</sub> | C <sub>19</sub> | 1.389(4) |
| N <sub>3</sub>  | C <sub>15</sub>             | 1.382(4) | C <sub>3</sub>  | C <sub>4</sub>  | 1.376(4) |
| C <sub>5</sub>  | C <sub>8</sub>              | 1.492(4) | C <sub>3</sub>  | C <sub>2</sub>  | 1.392(4) |
| C <sub>5</sub>  | C <sub>6</sub>              | 1.400(4) | C <sub>7</sub>  | C <sub>2</sub>  | 1.388(4) |
| C <sub>5</sub>  | C <sub>4</sub>              | 1.385(4) | C <sub>2</sub>  | C <sub>1</sub>  | 1.496(4) |
| C <sub>8</sub>  | C <sub>8</sub> <sup>1</sup> | 1.365(5) | C <sub>15</sub> | C <sub>16</sub> | 1.390(4) |
| C <sub>8</sub>  | C <sub>9</sub>              | 1.465(4) | C <sub>19</sub> | C <sub>18</sub> | 1.371(4) |
| C <sub>9</sub>  | C <sub>10</sub>             | 1.397(4) | C <sub>16</sub> | C <sub>17</sub> | 1.372(4) |
| C <sub>12</sub> | C <sub>13</sub>             | 1.420(4) | C <sub>17</sub> | C <sub>18</sub> | 1.388(4) |
| C <sub>12</sub> | C <sub>11</sub>             | 1.375(4) |                 |                 |          |

**Table S4** Bond Angles for **6b**.

| Atom                        | Atom            | Atom            | Angle/°  | Atom            | Atom            | Atom            | Angle/°  |
|-----------------------------|-----------------|-----------------|----------|-----------------|-----------------|-----------------|----------|
| C <sub>12</sub>             | N <sub>1</sub>  | C <sub>9</sub>  | 110.0(2) | C <sub>19</sub> | C <sub>14</sub> | N <sub>2</sub>  | 123.6(3) |
| C <sub>14</sub>             | N <sub>2</sub>  | C <sub>13</sub> | 118.8(2) | C <sub>19</sub> | C <sub>14</sub> | C <sub>15</sub> | 118.9(3) |
| C <sub>6</sub>              | C <sub>5</sub>  | C <sub>8</sub>  | 120.1(2) | C <sub>10</sub> | C <sub>11</sub> | C <sub>12</sub> | 107.8(3) |
| C <sub>4</sub>              | C <sub>5</sub>  | C <sub>8</sub>  | 121.9(2) | C <sub>2</sub>  | C <sub>3</sub>  | C <sub>4</sub>  | 121.3(3) |
| C <sub>4</sub>              | C <sub>5</sub>  | C <sub>6</sub>  | 118.0(2) | C <sub>3</sub>  | C <sub>4</sub>  | C <sub>5</sub>  | 121.5(3) |
| C <sub>8</sub> <sup>1</sup> | C <sub>8</sub>  | C <sub>5</sub>  | 122.3(3) | C <sub>2</sub>  | C <sub>7</sub>  | C <sub>6</sub>  | 122.0(3) |
| C <sub>9</sub>              | C <sub>8</sub>  | C <sub>5</sub>  | 112.2(2) | C <sub>7</sub>  | C <sub>2</sub>  | C <sub>3</sub>  | 117.3(3) |
| C <sub>8</sub>              | C <sub>9</sub>  | N <sub>1</sub>  | 127.0(2) | C <sub>1</sub>  | C <sub>2</sub>  | C <sub>3</sub>  | 121.1(3) |
| C <sub>10</sub>             | C <sub>9</sub>  | N <sub>1</sub>  | 106.4(2) | C <sub>1</sub>  | C <sub>2</sub>  | C <sub>7</sub>  | 121.6(3) |
| C <sub>10</sub>             | C <sub>9</sub>  | C <sub>8</sub>  | 126.6(2) | C <sub>14</sub> | C <sub>15</sub> | N <sub>3</sub>  | 119.2(3) |
| C <sub>13</sub>             | C <sub>12</sub> | N <sub>1</sub>  | 122.9(3) | C <sub>16</sub> | C <sub>15</sub> | N <sub>3</sub>  | 122.7(3) |
| C <sub>11</sub>             | C <sub>12</sub> | N <sub>1</sub>  | 107.7(2) | C <sub>16</sub> | C <sub>15</sub> | C <sub>14</sub> | 118.0(3) |
| C <sub>11</sub>             | C <sub>12</sub> | C <sub>13</sub> | 129.5(3) | C <sub>18</sub> | C <sub>19</sub> | C <sub>14</sub> | 122.0(3) |
| C <sub>7</sub>              | C <sub>6</sub>  | C <sub>5</sub>  | 119.9(3) | C <sub>17</sub> | C <sub>16</sub> | C <sub>15</sub> | 121.7(3) |
| C <sub>11</sub>             | C <sub>10</sub> | C <sub>9</sub>  | 108.1(2) | C <sub>18</sub> | C <sub>17</sub> | C <sub>16</sub> | 120.3(3) |
| C <sub>12</sub>             | C <sub>13</sub> | N <sub>2</sub>  | 123.9(3) | C <sub>17</sub> | C <sub>18</sub> | C <sub>19</sub> | 119.0(3) |
| C <sub>15</sub>             | C <sub>14</sub> | N <sub>2</sub>  | 117.6(3) |                 |                 |                 |          |

**Table S5** Bond Lengths for **6c**.

| Atom            | Atom                        | Length/Å | Atom            | Atom            | Length/Å |
|-----------------|-----------------------------|----------|-----------------|-----------------|----------|
| O <sub>1</sub>  | C <sub>19</sub>             | 1.378(5) | C <sub>11</sub> | C <sub>12</sub> | 1.376(6) |
| N <sub>1</sub>  | C <sub>9</sub>              | 1.375(5) | C <sub>2</sub>  | C <sub>3</sub>  | 1.390(6) |
| N <sub>1</sub>  | C <sub>12</sub>             | 1.378(5) | C <sub>2</sub>  | C <sub>7</sub>  | 1.389(6) |
| N <sub>2</sub>  | C <sub>13</sub>             | 1.274(5) | C <sub>2</sub>  | C <sub>1</sub>  | 1.521(6) |
| N <sub>2</sub>  | C <sub>14</sub>             | 1.425(5) | C <sub>13</sub> | C <sub>12</sub> | 1.426(6) |
| C <sub>9</sub>  | C <sub>8</sub>              | 1.460(5) | C <sub>3</sub>  | C <sub>4</sub>  | 1.389(6) |
| C <sub>9</sub>  | C <sub>10</sub>             | 1.396(5) | C <sub>14</sub> | C <sub>19</sub> | 1.405(6) |
| C <sub>8</sub>  | C <sub>8</sub> <sup>1</sup> | 1.370(7) | C <sub>14</sub> | C <sub>15</sub> | 1.403(6) |
| C <sub>8</sub>  | C <sub>5</sub>              | 1.498(5) | C <sub>19</sub> | C <sub>18</sub> | 1.390(6) |
| C <sub>5</sub>  | C <sub>6</sub>              | 1.397(5) | C <sub>15</sub> | C <sub>16</sub> | 1.373(6) |
| C <sub>5</sub>  | C <sub>4</sub>              | 1.389(5) | C <sub>18</sub> | C <sub>17</sub> | 1.370(7) |
| C <sub>10</sub> | C <sub>11</sub>             | 1.409(6) | C <sub>17</sub> | C <sub>16</sub> | 1.423(7) |
| C <sub>6</sub>  | C <sub>7</sub>              | 1.391(6) |                 |                 |          |

**Table S6** Bond Angles for **6c**.

| Atom                        | Atom            | Atom            | Angle/°  | Atom            | Atom            | Atom            | Angle/°  |
|-----------------------------|-----------------|-----------------|----------|-----------------|-----------------|-----------------|----------|
| C <sub>9</sub>              | N <sub>1</sub>  | C <sub>12</sub> | 110.1(3) | N <sub>2</sub>  | C <sub>13</sub> | C <sub>12</sub> | 122.7(4) |
| C <sub>13</sub>             | N <sub>2</sub>  | C <sub>14</sub> | 121.5(4) | N <sub>1</sub>  | C <sub>12</sub> | C <sub>13</sub> | 122.3(3) |
| N <sub>1</sub>              | C <sub>9</sub>  | C <sub>8</sub>  | 126.7(3) | C <sub>11</sub> | C <sub>12</sub> | N <sub>1</sub>  | 107.4(3) |
| N <sub>1</sub>              | C <sub>9</sub>  | C <sub>10</sub> | 106.9(3) | C <sub>11</sub> | C <sub>12</sub> | C <sub>13</sub> | 130.2(4) |
| C <sub>10</sub>             | C <sub>9</sub>  | C <sub>8</sub>  | 126.4(3) | C <sub>4</sub>  | C <sub>3</sub>  | C <sub>2</sub>  | 121.3(4) |
| C <sub>9</sub>              | C <sub>8</sub>  | C <sub>5</sub>  | 111.7(3) | C <sub>3</sub>  | C <sub>4</sub>  | C <sub>5</sub>  | 120.7(4) |
| C <sub>8</sub> <sup>1</sup> | C <sub>8</sub>  | C <sub>9</sub>  | 126.0(4) | C <sub>2</sub>  | C <sub>7</sub>  | C <sub>6</sub>  | 120.8(4) |
| C <sub>8</sub> <sup>1</sup> | C <sub>8</sub>  | C <sub>5</sub>  | 122.3(4) | C <sub>19</sub> | C <sub>14</sub> | N <sub>2</sub>  | 114.9(4) |
| C <sub>6</sub>              | C <sub>5</sub>  | C <sub>8</sub>  | 121.6(3) | C <sub>15</sub> | C <sub>14</sub> | N <sub>2</sub>  | 127.2(4) |
| C <sub>4</sub>              | C <sub>5</sub>  | C <sub>8</sub>  | 120.2(3) | C <sub>15</sub> | C <sub>14</sub> | C <sub>19</sub> | 117.8(4) |
| C <sub>4</sub>              | C <sub>5</sub>  | C <sub>6</sub>  | 118.1(3) | O <sub>1</sub>  | C <sub>19</sub> | C <sub>14</sub> | 118.7(4) |
| C <sub>9</sub>              | C <sub>10</sub> | C <sub>11</sub> | 107.5(3) | O <sub>1</sub>  | C <sub>19</sub> | C <sub>18</sub> | 119.6(4) |
| C <sub>7</sub>              | C <sub>6</sub>  | C <sub>5</sub>  | 120.9(4) | C <sub>18</sub> | C <sub>19</sub> | C <sub>14</sub> | 121.7(4) |
| C <sub>12</sub>             | C <sub>11</sub> | C <sub>10</sub> | 108.2(4) | C <sub>16</sub> | C <sub>15</sub> | C <sub>14</sub> | 121.4(4) |
| C <sub>3</sub>              | C <sub>2</sub>  | C <sub>1</sub>  | 120.8(4) | C <sub>17</sub> | C <sub>18</sub> | C <sub>19</sub> | 119.3(4) |
| C <sub>7</sub>              | C <sub>2</sub>  | C <sub>3</sub>  | 118.2(4) | C <sub>18</sub> | C <sub>17</sub> | C <sub>16</sub> | 120.6(4) |
| C <sub>7</sub>              | C <sub>2</sub>  | C <sub>1</sub>  | 121.0(4) | C <sub>15</sub> | C <sub>16</sub> | C <sub>17</sub> | 119.2(5) |

**Table S7** Bond Lengths for **6C+2H<sup>+</sup>**.

| Atom            | Atom            | Length/Å | Atom            | Atom            | Length/Å |
|-----------------|-----------------|----------|-----------------|-----------------|----------|
| O <sub>1</sub>  | C <sub>1</sub>  | 1.371(4) | C <sub>11</sub> | C <sub>10</sub> | 1.408(5) |
| O <sub>3</sub>  | C <sub>20</sub> | 1.247(5) | C <sub>6</sub>  | C <sub>1</sub>  | 1.396(5) |
| O <sub>2</sub>  | C <sub>20</sub> | 1.229(5) | C <sub>6</sub>  | C <sub>5</sub>  | 1.390(5) |
| N <sub>2</sub>  | C <sub>8</sub>  | 1.378(4) | C <sub>12</sub> | C <sub>12</sub> | 1.365(7) |
| N <sub>2</sub>  | C <sub>11</sub> | 1.350(4) | C <sub>1</sub>  | C <sub>2</sub>  | 1.375(5) |
| N <sub>1</sub>  | C <sub>7</sub>  | 1.310(5) | C <sub>18</sub> | C <sub>17</sub> | 1.398(5) |
| N <sub>1</sub>  | C <sub>6</sub>  | 1.425(4) | C <sub>10</sub> | C <sub>9</sub>  | 1.380(5) |
| F <sub>3</sub>  | C <sub>21</sub> | 1.319(5) | C <sub>5</sub>  | C <sub>4</sub>  | 1.379(5) |
| F <sub>2</sub>  | C <sub>21</sub> | 1.333(5) | C <sub>14</sub> | C <sub>15</sub> | 1.390(5) |
| F <sub>1</sub>  | C <sub>21</sub> | 1.302(5) | C <sub>2</sub>  | C <sub>3</sub>  | 1.382(5) |
| C <sub>13</sub> | C <sub>12</sub> | 1.493(5) | C <sub>17</sub> | C <sub>16</sub> | 1.394(6) |
| C <sub>13</sub> | C <sub>18</sub> | 1.391(5) | C <sub>4</sub>  | C <sub>3</sub>  | 1.391(6) |
| C <sub>13</sub> | C <sub>14</sub> | 1.394(5) | C <sub>16</sub> | C <sub>15</sub> | 1.383(6) |
| C <sub>7</sub>  | C <sub>8</sub>  | 1.394(5) | C <sub>16</sub> | C <sub>19</sub> | 1.500(5) |
| C <sub>8</sub>  | C <sub>9</sub>  | 1.400(5) | C <sub>20</sub> | C <sub>21</sub> | 1.531(6) |
| C <sub>11</sub> | C <sub>12</sub> |          |                 |                 |          |

**Table S8** Bond Angles for **6C+2H<sup>+</sup>**.

| Atom                         | Atom            | Atom            | Angle/°  | Atom            | Atom            | Atom            | Angle/°  |
|------------------------------|-----------------|-----------------|----------|-----------------|-----------------|-----------------|----------|
| C <sub>11</sub>              | N <sub>2</sub>  | C <sub>8</sub>  | 109.6(3) | C <sub>9</sub>  | C <sub>10</sub> | C <sub>11</sub> | 107.7(3) |
| C <sub>7</sub>               | N <sub>1</sub>  | C <sub>6</sub>  | 126.3(3) | C <sub>4</sub>  | C <sub>5</sub>  | C <sub>6</sub>  | 119.4(4) |
| C <sub>18</sub>              | C <sub>13</sub> | C <sub>12</sub> | 121.0(3) | C <sub>15</sub> | C <sub>14</sub> | C <sub>13</sub> | 120.7(4) |
| C <sub>18</sub>              | C <sub>13</sub> | C <sub>14</sub> | 118.5(3) | C <sub>1</sub>  | C <sub>2</sub>  | C <sub>3</sub>  | 120.1(4) |
| C <sub>14</sub>              | C <sub>13</sub> | C <sub>12</sub> | 120.6(3) | C <sub>16</sub> | C <sub>17</sub> | C <sub>18</sub> | 121.2(4) |
| N <sub>1</sub>               | C <sub>7</sub>  | C <sub>8</sub>  | 126.5(3) | C <sub>10</sub> | C <sub>9</sub>  | C <sub>8</sub>  | 107.5(3) |
| N <sub>2</sub>               | C <sub>8</sub>  | C <sub>7</sub>  | 125.7(3) | C <sub>5</sub>  | C <sub>4</sub>  | C <sub>3</sub>  | 120.3(4) |
| N <sub>2</sub>               | C <sub>8</sub>  | C <sub>9</sub>  | 107.4(3) | C <sub>17</sub> | C <sub>16</sub> | C <sub>19</sub> | 120.8(4) |
| C <sub>7</sub>               | C <sub>8</sub>  | C <sub>9</sub>  | 126.9(3) | C <sub>15</sub> | C <sub>16</sub> | C <sub>17</sub> | 117.9(3) |
| N <sub>2</sub>               | C <sub>11</sub> | C <sub>12</sub> | 121.4(3) | C <sub>15</sub> | C <sub>16</sub> | C <sub>19</sub> | 121.3(4) |
| N <sub>2</sub>               | C <sub>11</sub> | C <sub>10</sub> | 107.7(3) | O <sub>3</sub>  | C <sub>20</sub> | C <sub>21</sub> | 114.2(4) |
| C <sub>10</sub>              | C <sub>11</sub> | C <sub>12</sub> | 130.8(3) | O <sub>2</sub>  | C <sub>20</sub> | O <sub>3</sub>  | 129.9(4) |
| C <sub>1</sub>               | C <sub>6</sub>  | N <sub>1</sub>  | 116.3(3) | O <sub>2</sub>  | C <sub>20</sub> | C <sub>21</sub> | 115.9(4) |
| C <sub>5</sub>               | C <sub>6</sub>  | N <sub>1</sub>  | 123.5(3) | C <sub>2</sub>  | C <sub>3</sub>  | C <sub>4</sub>  | 120.0(4) |
| C <sub>5</sub>               | C <sub>6</sub>  | C <sub>1</sub>  | 120.2(3) | C <sub>16</sub> | C <sub>15</sub> | C <sub>14</sub> | 121.4(4) |
| C <sub>11</sub>              | C <sub>12</sub> | C <sub>13</sub> | 115.9(3) | F <sub>3</sub>  | C <sub>21</sub> | F <sub>2</sub>  | 103.9(4) |
| C <sub>12</sub> <sup>1</sup> | C <sub>12</sub> | C <sub>13</sub> | 122.2(4) | F <sub>3</sub>  | C <sub>21</sub> | C <sub>20</sub> | 111.7(3) |
| C <sub>12</sub> <sup>1</sup> | C <sub>12</sub> | C <sub>11</sub> | 121.9(4) | F <sub>2</sub>  | C <sub>21</sub> | C <sub>20</sub> | 111.2(4) |
| O <sub>1</sub>               | C <sub>1</sub>  | C <sub>6</sub>  | 117.0(3) | F <sub>1</sub>  | C <sub>21</sub> | F <sub>3</sub>  | 109.6(4) |
| O <sub>1</sub>               | C <sub>1</sub>  | C <sub>2</sub>  | 123.1(4) | F <sub>1</sub>  | C <sub>21</sub> | F <sub>2</sub>  | 104.8(4) |
| C <sub>2</sub>               | C <sub>1</sub>  | C <sub>6</sub>  | 119.9(4) | F <sub>1</sub>  | C <sub>21</sub> | C <sub>20</sub> | 114.7(4) |
| C <sub>13</sub>              | C <sub>18</sub> | C <sub>17</sub> | 120.2(4) |                 |                 |                 |          |

## ORTEP Diagram

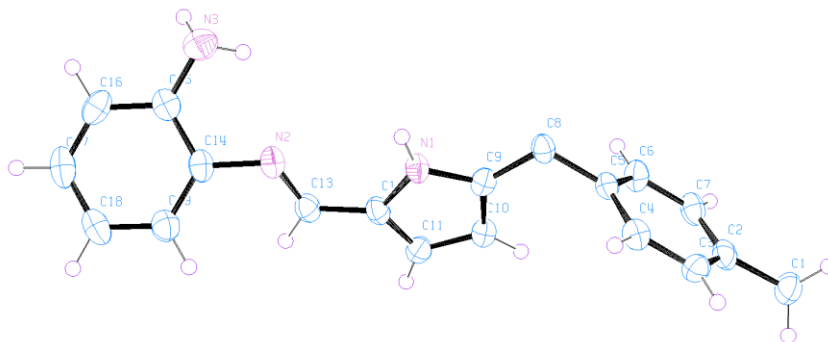

**Figure S10** ORTEP drawing (ellipsoids at 50% probability) of complex **6b**.

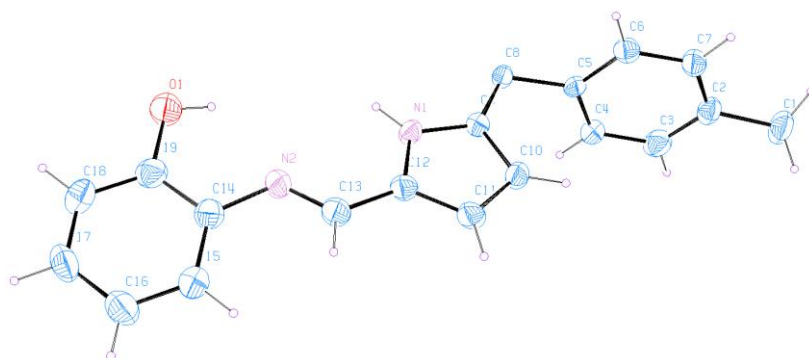

**Figure S11** ORTEP drawing (ellipsoids at 50% probability) of complex **6c**.

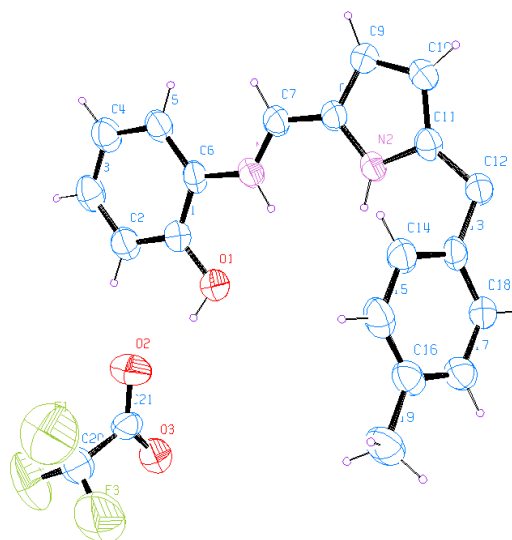

**Figure S12** ORTEP drawing (ellipsoids at 50% probability) of complex **6c+2H<sup>+</sup>**.



## PXRD Plot

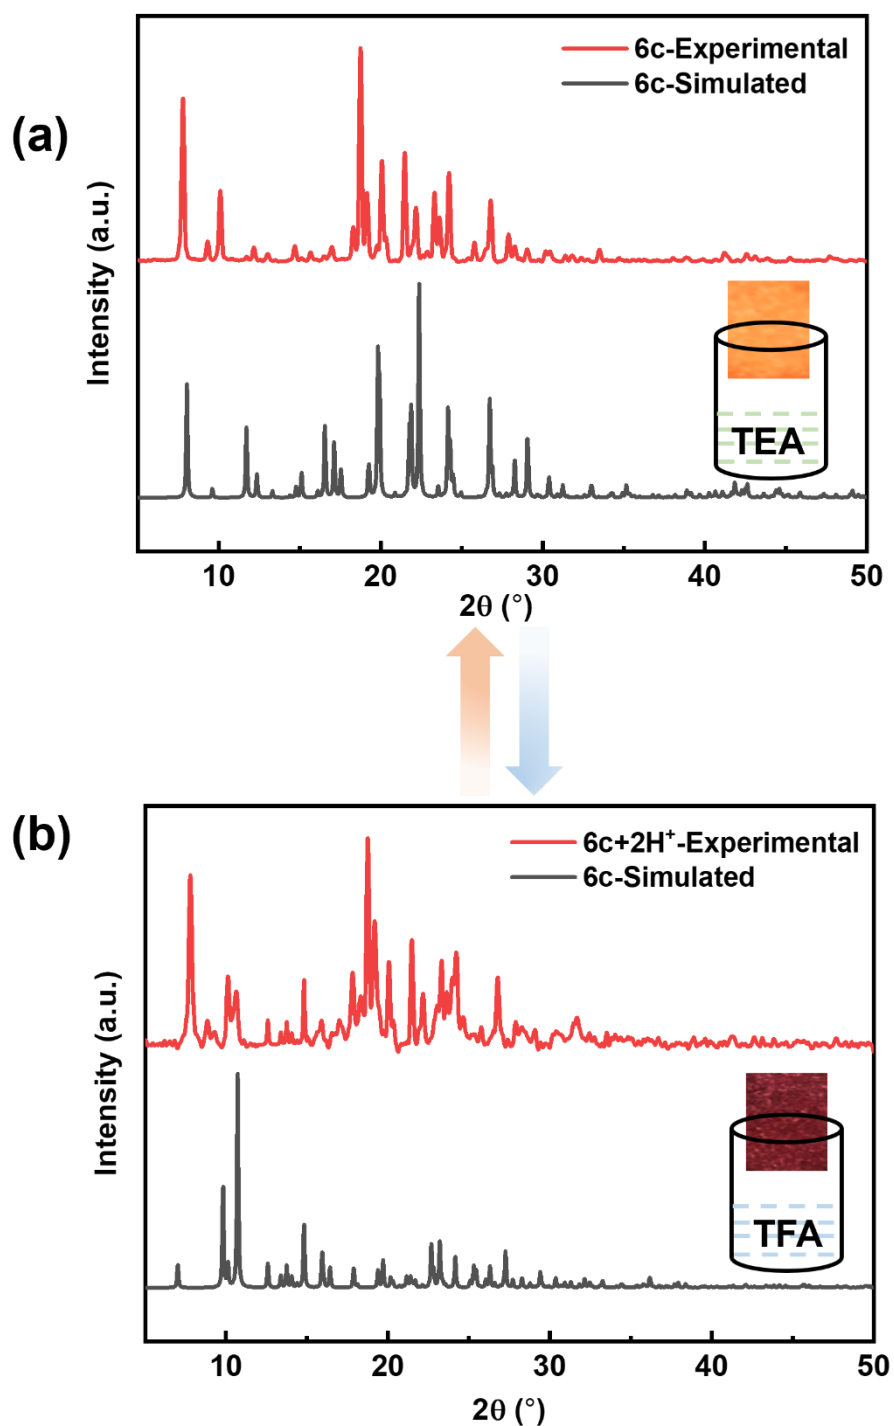

**Figure S13** Simulated and experimental PXRD data of (a) **6c** under ambient conditions, (b) **6c** after being exposed to the TFA vapour, matching with the simulated data of **6c+2H<sup>+</sup>**

## DFT Optimized Structures

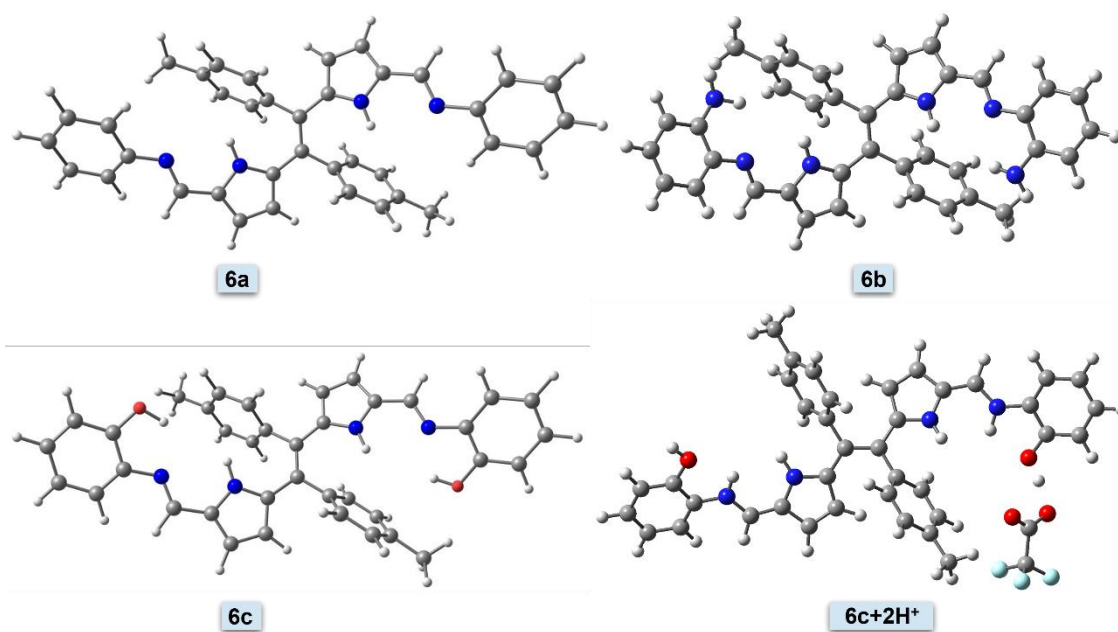

Figure S14 Optimized Structures of the ligand **6a**, **6b**, and **6c+2H<sup>+</sup>**

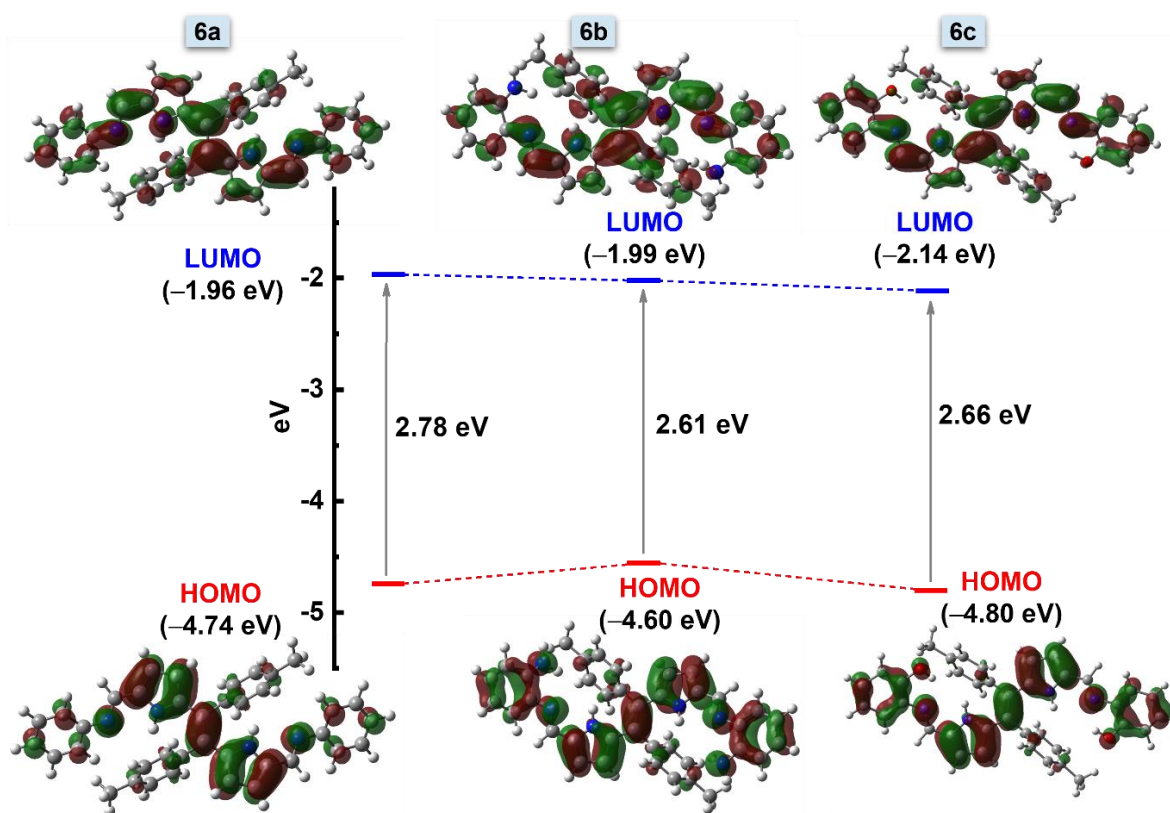

Figure S15 Energy profile diagram of the ligands **6a**, **6b**, and **6c**.

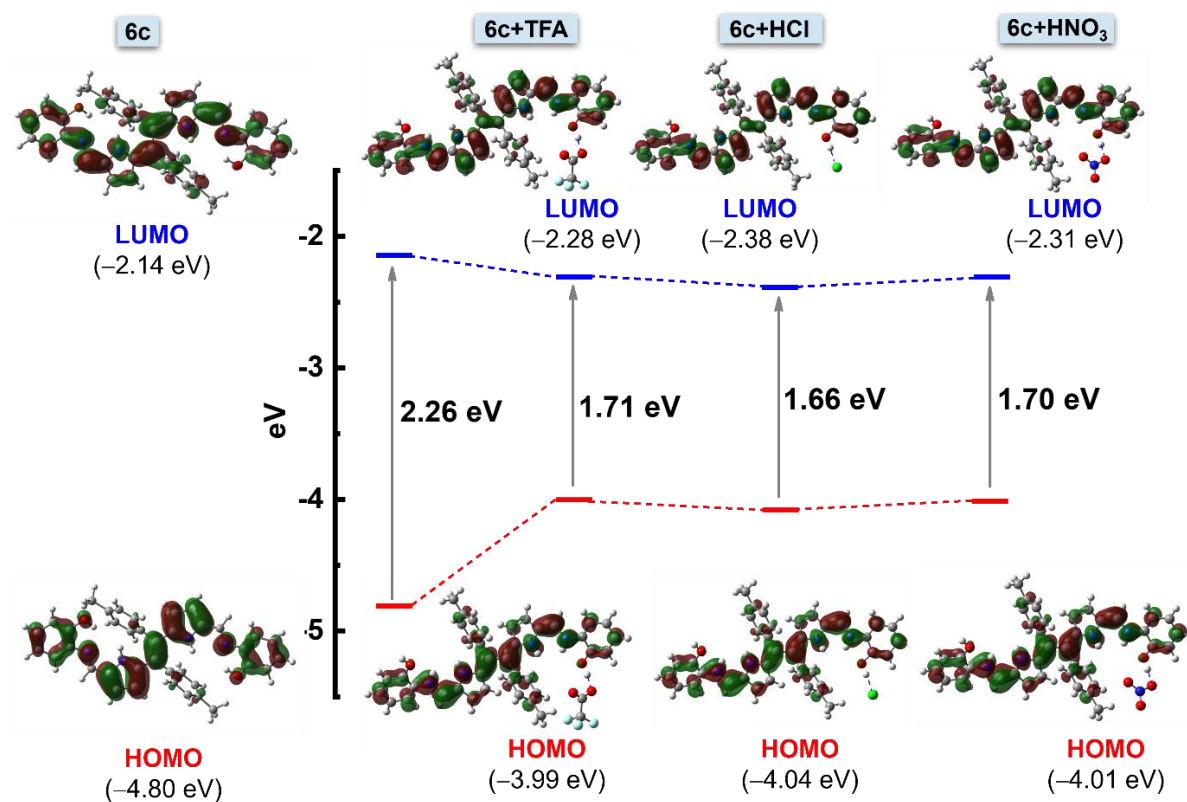

**Figure S16** Selected frontier molecular orbital with energy level diagrams of compound **6c** and **6c+TFA**, **6c+HCl**, **6c+HNO<sub>3</sub>**.

### TD-DFT and Natural Transition Orbit analysis of **6a**, **6b** and **6c**

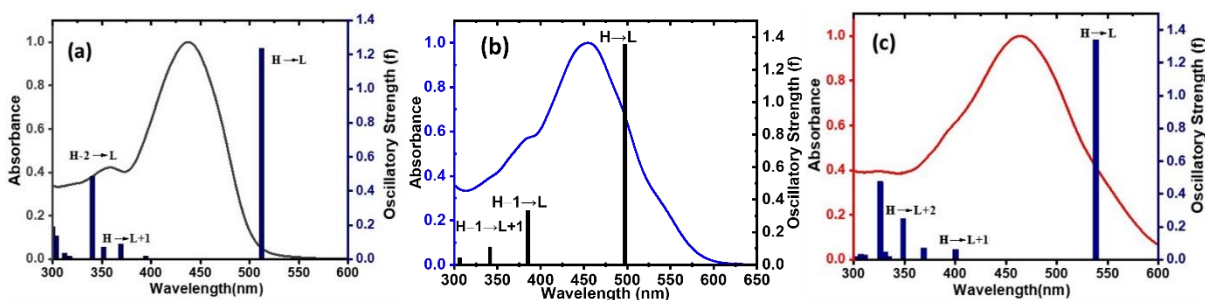

**Figure S17-A** The calculated excitations (blue vertical lines) are overlaid with the experimental absorption spectra: black for **6a**, sky blue for **6b**, and red for **6c**.

| Comp. | $\lambda_{nm}$ , cal |                | Hole                                                                                | Electron                                                                              |
|-------|----------------------|----------------|-------------------------------------------------------------------------------------|---------------------------------------------------------------------------------------|
| 6c    | 538.30               | S1<br>(W=0.99) | 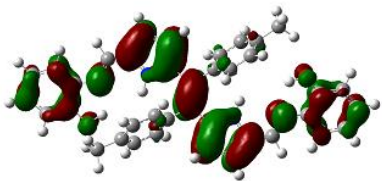   |    |
|       | 369.06               | S4<br>(W=0.89) |    |    |
|       | 335.03               | S6<br>(W=0.90) |    |    |
| 6b    | 497.45               | S1<br>(W=0.98) |   |   |
|       | 385.02               | S3<br>(W=0.97) |  |  |
|       | 341.42               | S5<br>(W=0.94) |  |  |
| 6a    | 512.16               | S1<br>(W=0.99) |  |  |
|       | 394.45               | S2<br>(W=0.84) |  |  |

|  |        |                |                                                                                   |                                                                                     |
|--|--------|----------------|-----------------------------------------------------------------------------------|-------------------------------------------------------------------------------------|
|  | 314.37 | S7<br>(W=0.94) | 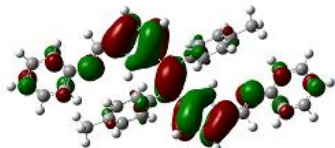 |  |
|--|--------|----------------|-----------------------------------------------------------------------------------|-------------------------------------------------------------------------------------|

**Figure S17-B** Natural transition orbitals (NTOs) of compounds **6c**, **6b**, and **6a** are shown in only occupied (holes) and unoccupied (electrons) NTO pairs that contribute more than 50% to the excited state.

### <sup>1</sup>H NMR Spectra

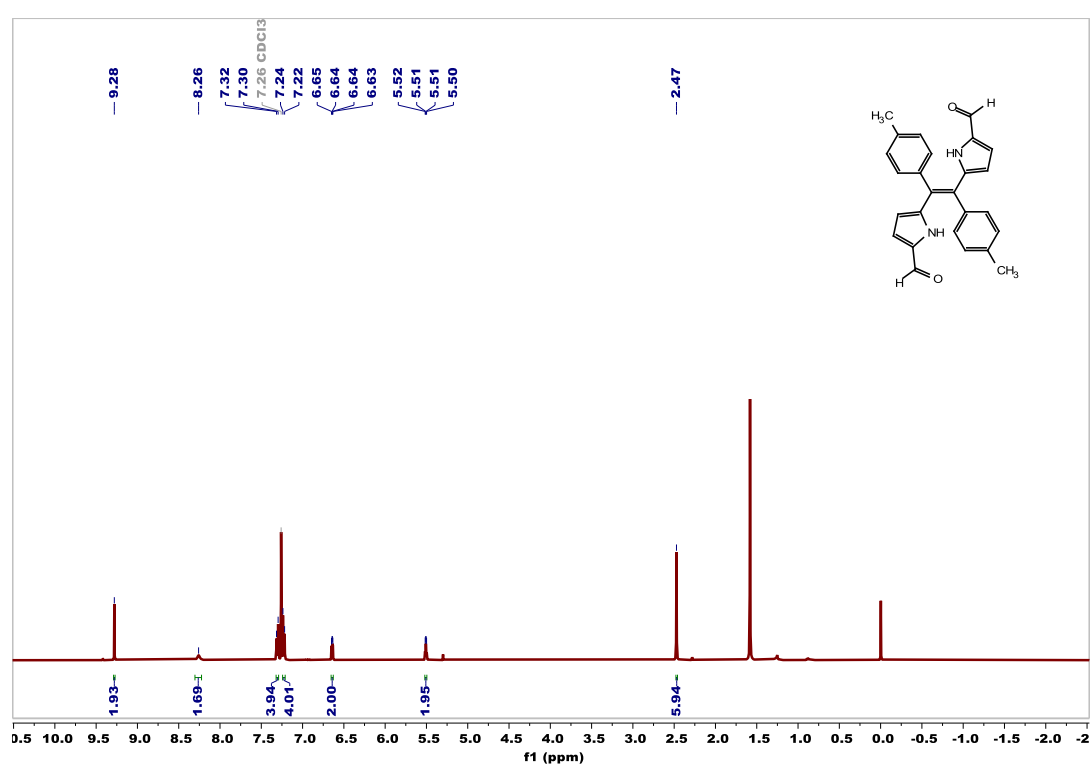

**Figure S18** <sup>1</sup>H NMR spectrum of compound **5** in CDCl<sub>3</sub> at room temperature.

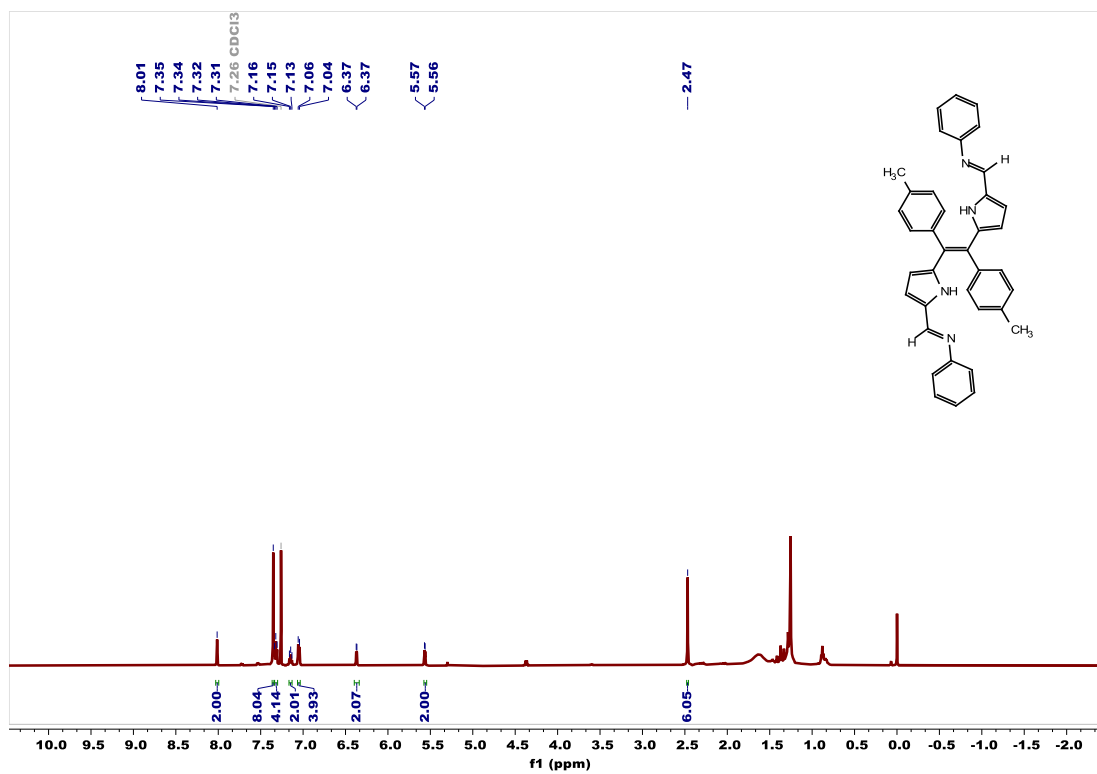

**Figure S19**  $^1\text{H}$  NMR spectrum of compound **6a** in  $\text{CDCl}_3$  at room temperature.

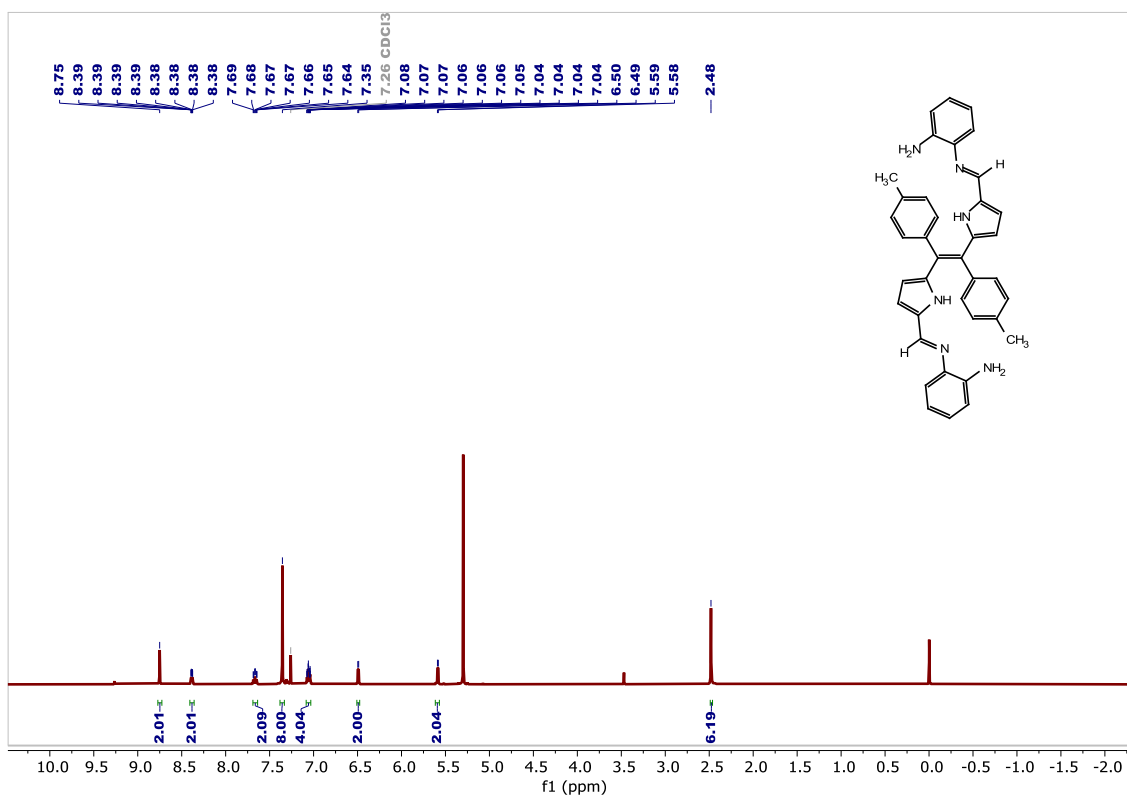

**Figure S20**  $^1\text{H}$  NMR spectrum of compound **6b** in  $\text{CDCl}_3$  at room temperature.

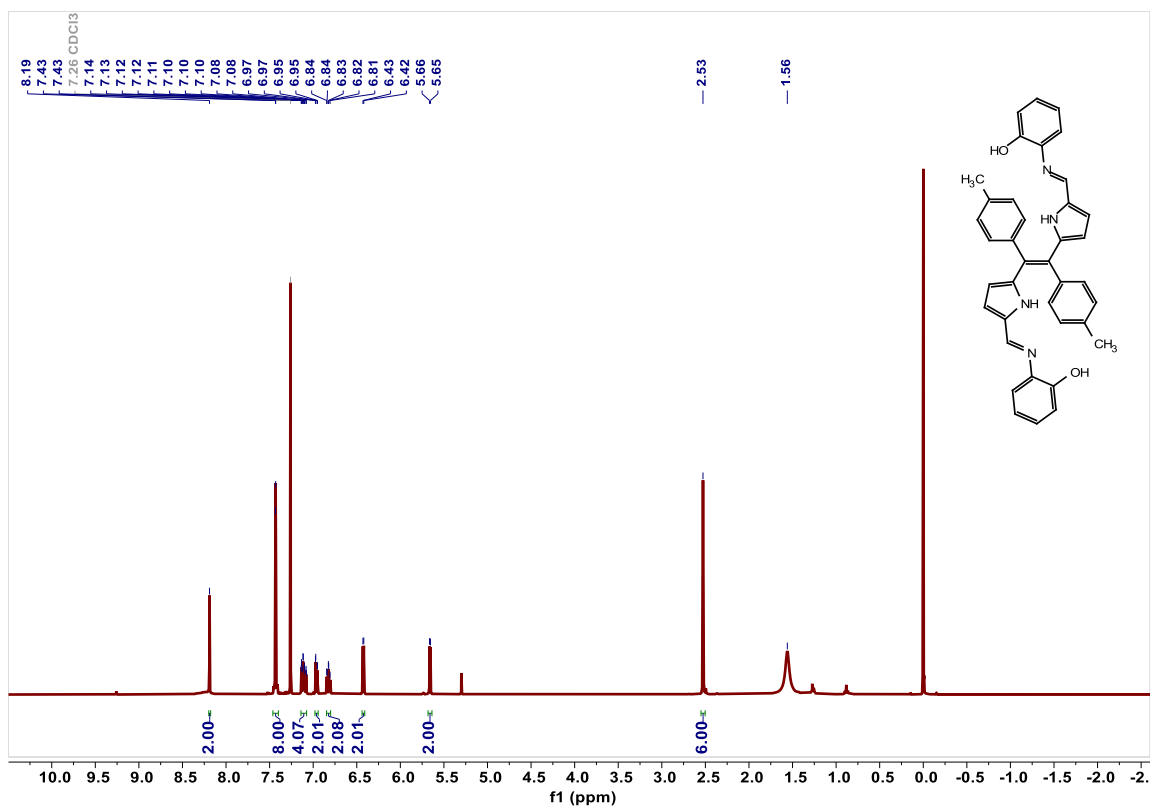

Figure S21 <sup>1</sup>H NMR spectrum of compound **6c** in CDCl<sub>3</sub> at room temperature.

### <sup>13</sup>C NMR Spectra

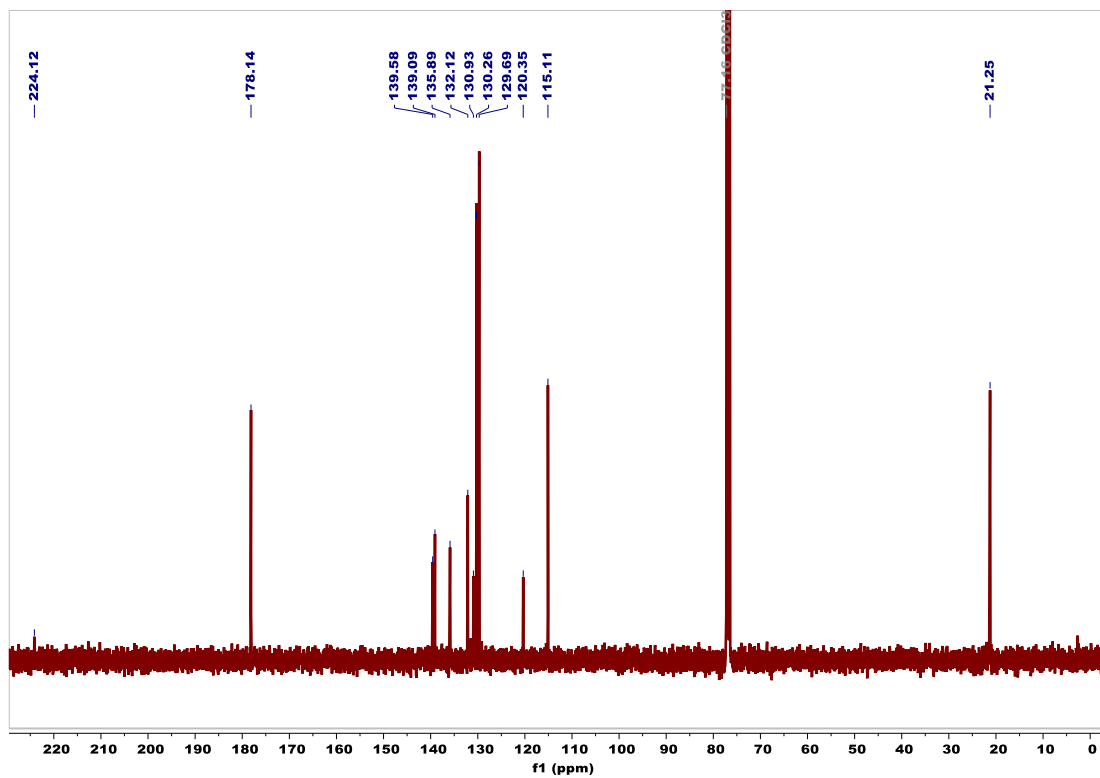

Figure S22  $^{13}\text{C}$  NMR spectrum of compound **5** in  $\text{CDCl}_3$  at room temperature.

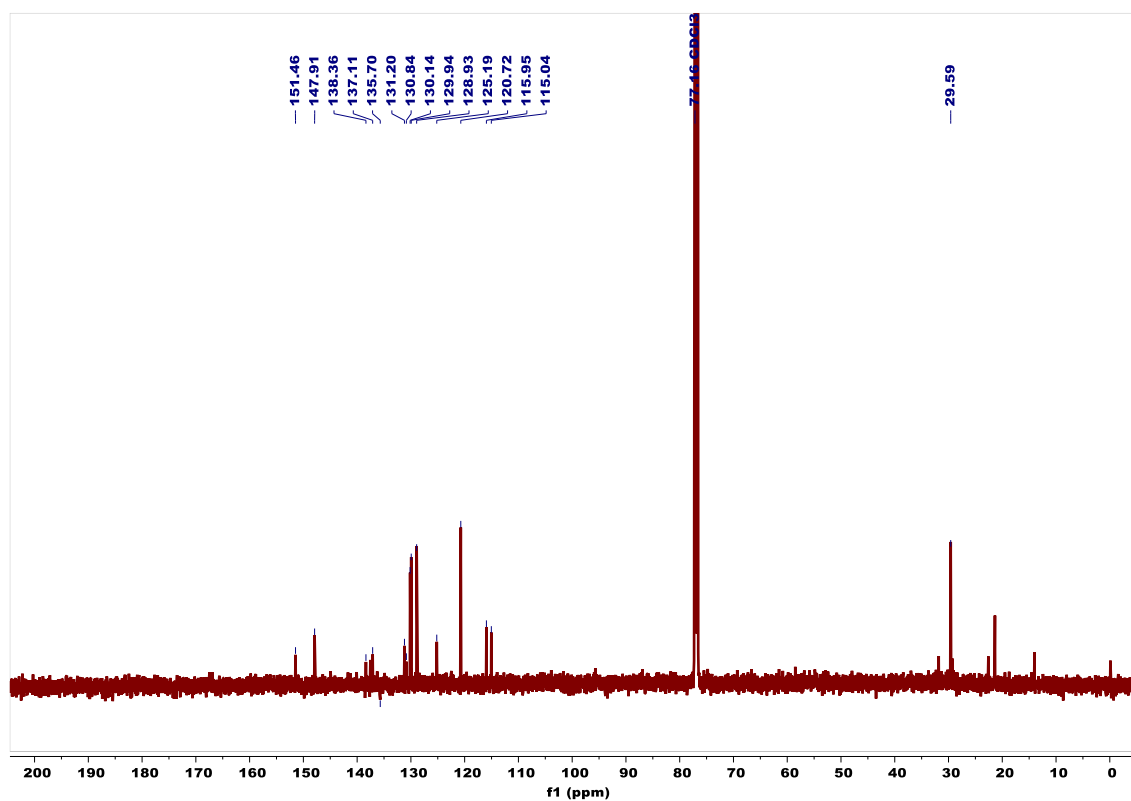

Figure S23  $^{13}\text{C}$  NMR spectrum of compound **6a** in  $\text{CDCl}_3$  at room temperature.

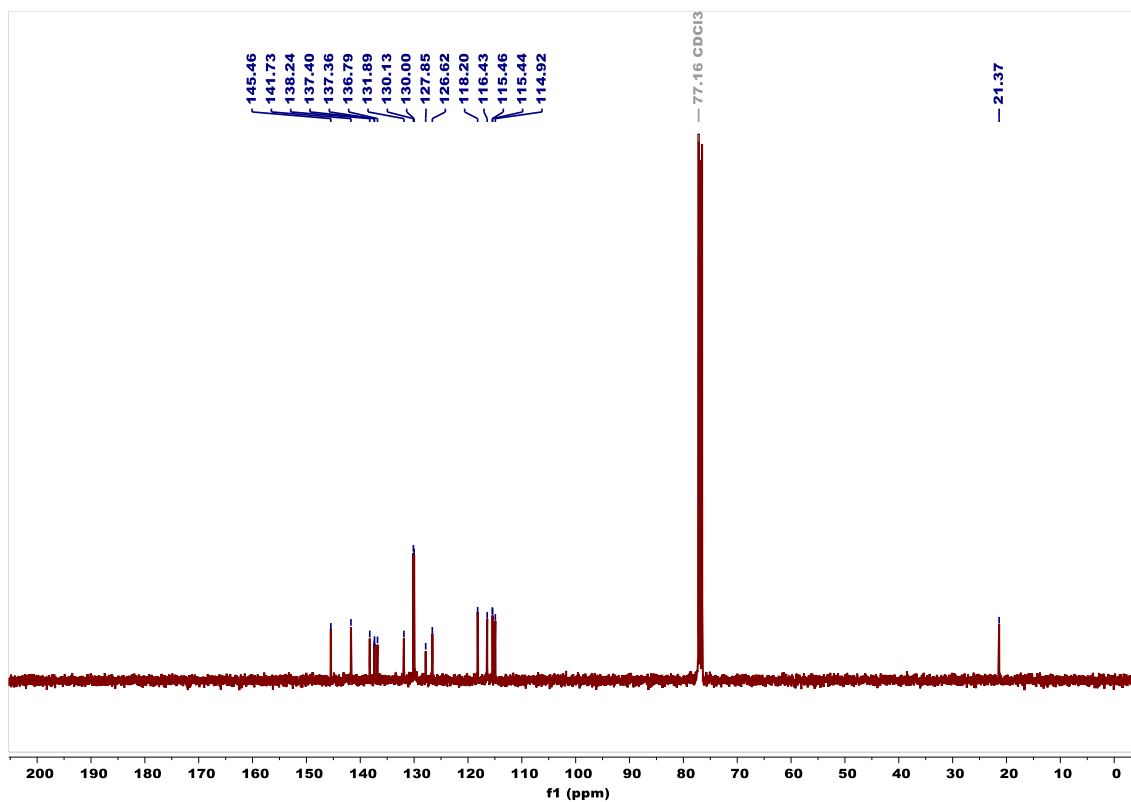

Figure S24  $^{13}\text{C}$  NMR spectrum of compound **6b** in  $\text{CDCl}_3$  at room temperature.



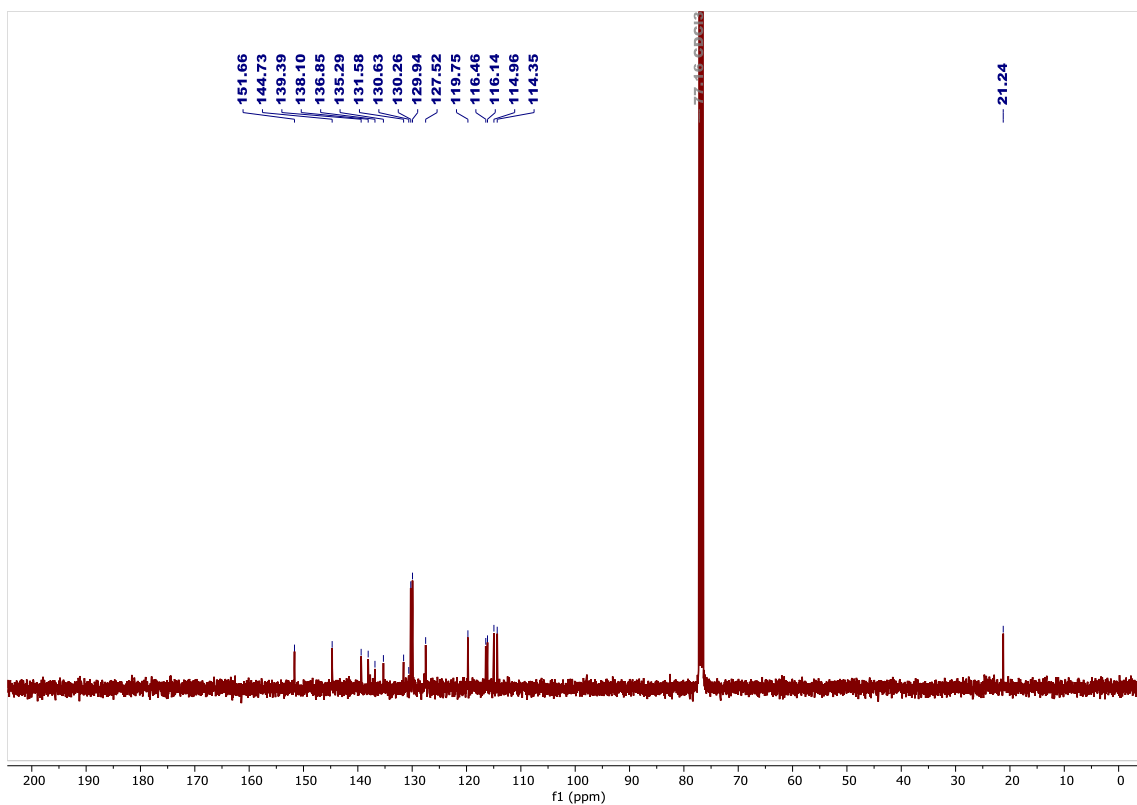

Figure S25  $^{13}\text{C}$  NMR spectrum of compound **6c** in  $\text{CDCl}_3$  at room temperature.

### $^1\text{H}$ - $^1\text{H}$ COSY Spectra

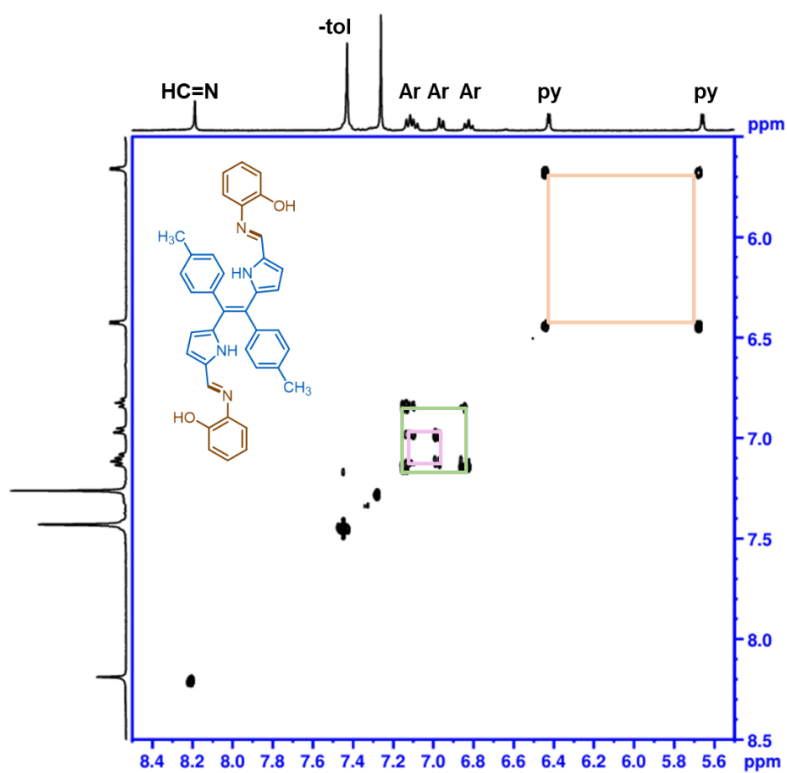

Figure S26  $^1\text{H}$ - $^1\text{H}$  COSY spectrum of the **6c** in  $\text{CDCl}_3$  at room temperature.

# HRMS Spectra

## Compound Details

Cpd. 1: C<sub>26</sub>H<sub>22</sub>N<sub>2</sub>O<sub>2</sub>

| Formula                                                       | m/z      | Observed M/Z     | Difference Da      | Difference PPM     | Score |
|---------------------------------------------------------------|----------|------------------|--------------------|--------------------|-------|
| C <sub>26</sub> H <sub>22</sub> N <sub>2</sub> O <sub>2</sub> | 395.1750 | 395.175041238921 | -0.269532039283149 | -0.683799678774841 | 99.56 |

## Compound Spectra (Zoomed)

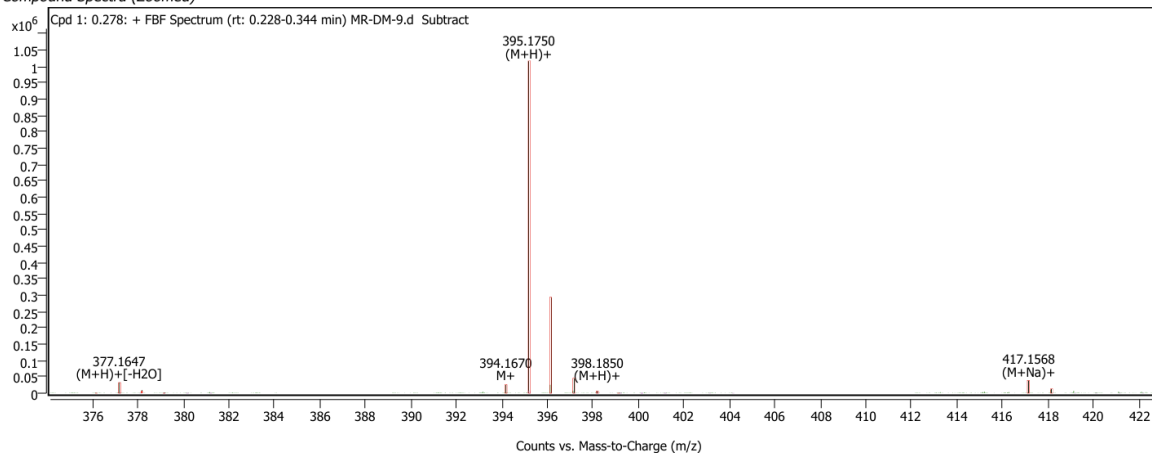

Figure S27 High-resolution mass spectrum of **5**

## Compound Details

Cpd. 1: C<sub>38</sub>H<sub>32</sub>N<sub>4</sub>

| Formula                                        | m/z      | Observed M/Z    | Difference Da    | Difference PPM   | Score |
|------------------------------------------------|----------|-----------------|------------------|------------------|-------|
| C <sub>38</sub> H <sub>32</sub> N <sub>4</sub> | 545.2712 | 545.27116445582 | 1.11894831525206 | 2.05589749456674 | 96.23 |

## Compound Spectra (Zoomed)

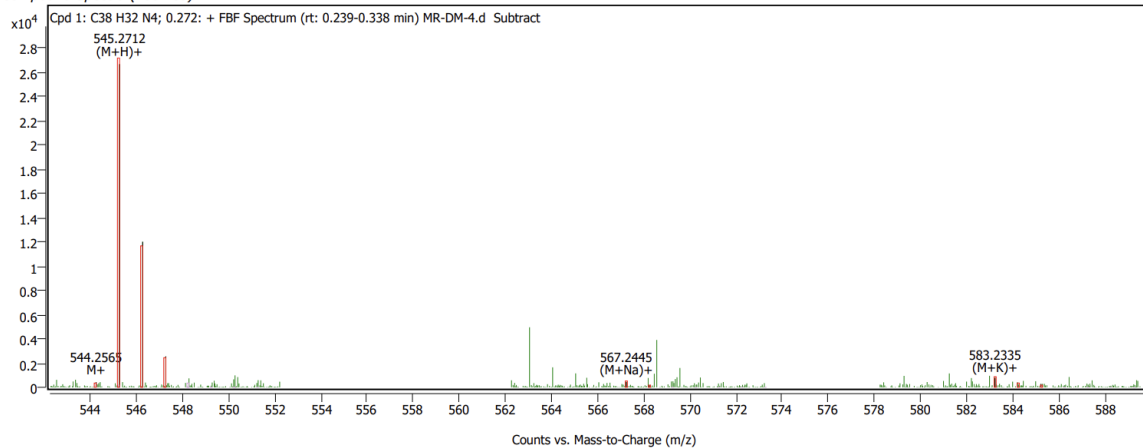

Figure S28 High-resolution mass spectrum of **6a**

**Compound Details**

Cpd. 1: C38 H34 N6

| Formula    | m/z      | Observed M/Z     | Difference Da    | Difference PPM  | Score |
|------------|----------|------------------|------------------|-----------------|-------|
| C38 H34 N6 | 575.2929 | 575.292915292356 | 1.00560085309098 | 1.7510499789222 | 96.83 |

Department of Chemistry I.I.T. (B)

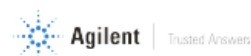

**Compound Spectra (Zoomed)**

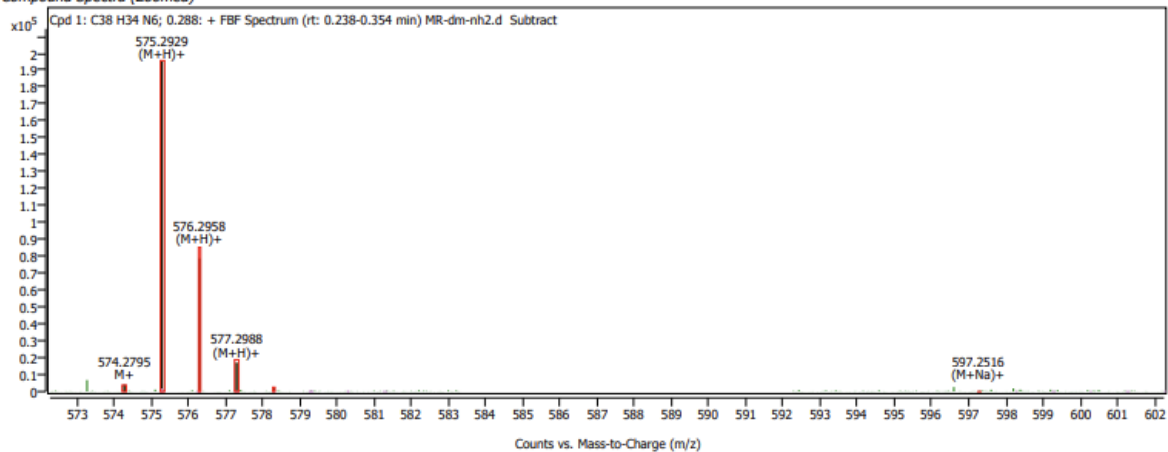

**Figure S29** High resolution mass spectrum of **6b**

**Compound Details**

Cpd. 1: C38 H32 N4 O2

| Formula       | m/z      | Observed M/Z    | Difference Da      | Difference PPM     | Score |
|---------------|----------|-----------------|--------------------|--------------------|-------|
| C38 H32 N4 O2 | 577.2593 | 577.25925386928 | -0.432561225352401 | -0.750645256400943 | 99.38 |

**Compound Spectra (Zoomed)**

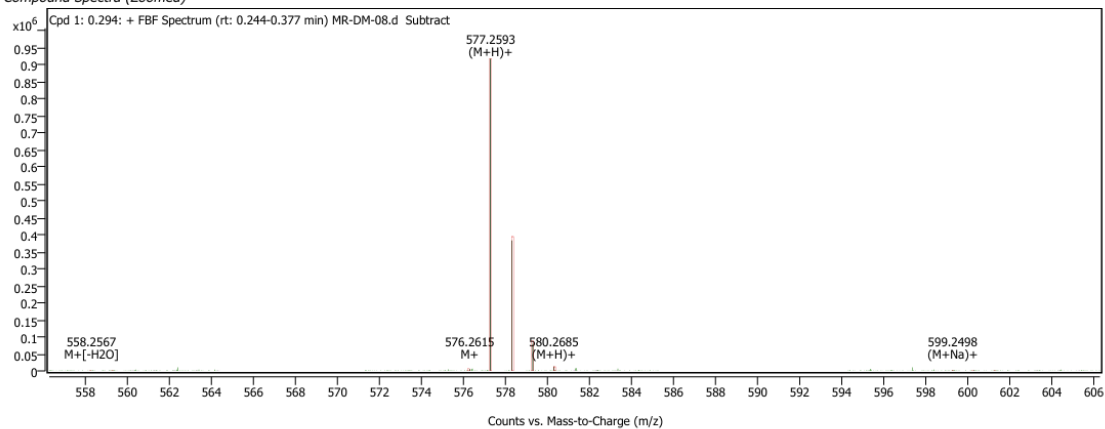

**Figure S30** High resolution mass spectrum of **6c**.

**Compound Details**

Cpd. 1: C42 H34 F6 N4 O6

| Formula          | m/z      | Observed M/Z     | Difference Da    | Difference PPM    | Score |
|------------------|----------|------------------|------------------|-------------------|-------|
| C42 H34 F6 N4 O6 | 804.2293 | 804.229256269044 | -7.3788299895341 | -9.17493037964059 | 49.85 |

Compound Spectra (Zoomed)

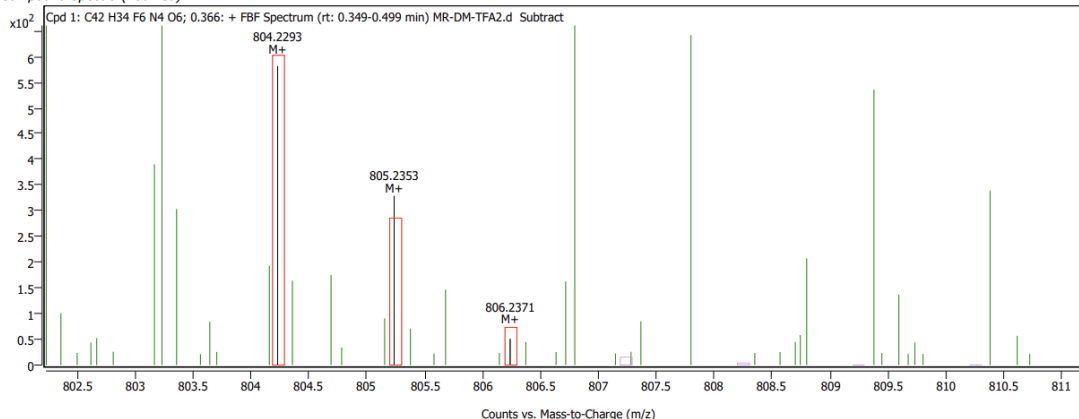

**Figure S31** High resolution mass spectrum of **6c+2H<sup>+</sup>**.

## DFT- Optimized XYZ Coordinates

**Table S9** S<sub>0</sub> optimized geometry of the compound **6a** at B3LYP/6-31g (d,p)

| Atom | X        | Y        | Z        | Atom | X        | Y        | Z        |
|------|----------|----------|----------|------|----------|----------|----------|
| N    | -2.38035 | 1.173529 | -0.07655 | C    | 7.217522 | -1.804   | -1.42053 |
| N    | -5.06077 | 0.808061 | -0.68551 | C    | 8.372884 | 0.696704 | -0.94532 |
| C    | -1.13293 | 1.599686 | 0.297924 | C    | 9.135593 | -0.32416 | -1.52275 |
| C    | 0.024701 | 0.749362 | 0.531421 | C    | -5.32111 | -2.98801 | 1.020638 |
| C    | 1.31868  | 1.486828 | 0.621456 | C    | 8.548434 | -1.57011 | -1.76415 |
| C    | -1.20148 | 3.004919 | 0.375132 | H    | -2.685   | 0.220919 | -0.21179 |
| C    | 1.818508 | 2.214609 | -0.46869 | H    | -0.37285 | 3.643146 | 0.643196 |
| C    | -2.51027 | 3.39774  | 0.052884 | H    | 1.228865 | 2.277159 | -1.37808 |
| C    | 3.850136 | 2.747431 | 0.761433 | H    | -2.9057  | 4.404219 | 0.028423 |
| C    | -4.61713 | 2.012975 | -0.54102 | H    | -5.2457  | 2.905562 | -0.64951 |
| C    | -3.23601 | 2.233884 | -0.22073 | H    | 3.929363 | 1.96056  | 2.764995 |
| C    | 3.337946 | 2.036854 | 1.856283 | H    | 1.719247 | 0.845037 | 2.633729 |
| C    | 2.09217  | 1.417889 | 1.790333 | H    | 3.453287 | 3.366891 | -1.26186 |
| C    | 3.070133 | 2.827699 | -0.39943 | H    | -7.23776 | 2.304693 | 0.064019 |
| C    | -6.41804 | 0.556379 | -0.91227 | H    | -8.30095 | -1.9176  | -2.32687 |
| C    | -6.74223 | -0.64976 | -1.56189 | H    | -10.139  | -0.40503 | -1.59295 |
| C    | -7.46608 | 1.397515 | -0.48715 | H    | 5.098221 | 4.442394 | 1.252636 |
| C    | -8.07034 | -0.98739 | -1.81523 | H    | 5.880254 | 2.875295 | 1.49127  |
| C    | -9.1032  | -0.13791 | -1.40602 | H    | 5.651144 | 3.517657 | -0.15009 |
| C    | 5.194415 | 3.428863 | 0.84112  | H    | -9.59012 | 1.704816 | -0.39552 |

|   |          |          |          |   |          |          |          |
|---|----------|----------|----------|---|----------|----------|----------|
| C | -8.79271 | 1.05019  | -0.73645 | H | 2.708594 | -0.23648 | -0.12297 |
| N | 2.399904 | -1.14969 | 0.176613 | H | 0.370391 | -3.43695 | 1.317768 |
| N | 5.104543 | -0.9275  | -0.45806 | H | -1.7683  | -0.43747 | 2.702423 |
| C | 1.145387 | -1.4985  | 0.605349 | H | 2.916324 | -4.29866 | 0.913729 |
| C | -0.01515 | -0.62401 | 0.6496   | H | 5.266597 | -2.97007 | 0.016217 |
| C | -1.31703 | -1.33622 | 0.802404 | H | -3.44046 | -3.37814 | -0.91768 |
| C | 1.207395 | -2.86201 | 0.950385 | H | -1.16728 | -2.39651 | -1.06455 |
| C | -2.13041 | -1.09721 | 1.919883 | H | -4.02801 | -1.44652 | 2.868896 |
| C | 2.522225 | -3.30674 | 0.738357 | H | 6.758432 | -2.76351 | -1.63932 |
| C | -3.90774 | -2.4646  | 0.975866 | H | 8.817147 | 1.671479 | -0.76343 |
| C | 4.641627 | -2.0738  | -0.08474 | H | 10.17165 | -0.14677 | -1.79547 |
| C | 3.255226 | -2.21759 | 0.257295 | H | -5.68253 | -3.07029 | 2.050871 |
| C | -3.07493 | -2.73923 | -0.11769 | H | -5.39679 | -3.97167 | 0.544437 |
| C | -1.79489 | -2.19093 | -0.20278 | H | -5.99504 | -2.3076  | 0.483057 |
| C | -3.40422 | -1.65526 | 2.0037   | H | 9.12756  | -2.36135 | -2.23238 |
| C | 6.448998 | -0.78571 | -0.823   | H | 6.429445 | 1.254838 | -0.16995 |
| C | 7.039403 | 0.473312 | -0.61025 | H | -5.92732 | -1.29908 | -1.86685 |

**Table S10** S<sub>0</sub> optimized geometry of the compound **6b** at B3LYP/6-31g (d,p)

| Atom | X        | Y        | Z        | Atom | X        | Y        | Z        |
|------|----------|----------|----------|------|----------|----------|----------|
| N    | 1.463213 | -0.22493 | -1.0695  | N    | -1.60208 | -0.11763 | 1.261311 |
| H    | 1.904134 | -0.20469 | -0.16135 | H    | -1.92062 | -0.28179 | 0.317692 |
| N    | 3.948294 | -1.45325 | -0.86871 | N    | -3.96036 | -1.49781 | 0.96081  |
| N    | 5.819558 | -0.25624 | 0.742696 | N    | -5.40499 | -0.83582 | -1.26836 |
| H    | 4.838441 | -0.00295 | 0.704826 | H    | -4.73434 | -0.21704 | -0.83119 |
| H    | 6.235665 | -0.08706 | 1.648643 | H    | -6.12408 | -0.3471  | -1.78345 |
| C    | -1.51429 | 1.988001 | -0.88738 | C    | 1.463019 | 1.912771 | 0.950365 |
| N    | -0.29189 | 1.330178 | -0.59515 | N    | 0.168624 | 1.385031 | 0.719497 |
| C    | 3.315659 | -1.51104 | -1.99556 | C    | -3.49853 | -1.34216 | 2.159024 |
| H    | 3.723219 | -2.01827 | -2.87855 | H    | -4.00233 | -1.7304  | 3.052514 |
| C    | 0.392943 | 0.502893 | -1.48635 | C    | -0.59836 | 0.704088 | 1.665319 |
| C    | 2.057376 | -0.85001 | -2.15432 | C    | -2.29808 | -0.58924 | 2.36033  |
| C    | -1.79239 | 3.216628 | -0.27564 | C    | 2.29036  | 1.38273  | 1.952056 |
| H    | -1.05585 | 3.659103 | 0.386739 | H    | 1.920185 | 0.602843 | 2.605888 |
| C    | -2.4791  | 1.388392 | -1.70747 | C    | 1.966014 | 2.899208 | 0.092385 |
| H    | -2.291   | 0.416934 | -2.15    | H    | 1.333547 | 3.292527 | -0.69609 |
| C    | 1.293067 | -0.53705 | -3.27304 | C    | -1.67121 | -0.07315 | 3.490309 |
| H    | 1.487129 | -0.87977 | -4.28034 | H    | -1.97016 | -0.25804 | 4.513183 |
| C    | 0.247278 | 0.322476 | -2.86478 | C    | -0.60601 | 0.753196 | 3.061871 |
| H    | -0.51489 | 0.768935 | -3.48289 | H    | 0.069937 | 1.326602 | 3.676499 |
| C    | 6.098738 | -1.50725 | 0.197044 | C    | -5.86462 | -1.8601  | -0.44673 |
| C    | 5.169917 | -2.11237 | -0.69374 | C    | -5.12257 | -2.23248 | 0.709347 |
| C    | -3.98422 | 3.272952 | -1.34262 | C    | 4.131599 | 2.803877 | 1.2106   |
| C    | -3.01531 | 3.841073 | -0.502   | C    | 3.600123 | 1.842487 | 2.079719 |

|   |          |          |          |   |          |          |          |
|---|----------|----------|----------|---|----------|----------|----------|
| H | -3.22292 | 4.791243 | -0.01704 | H | 4.230667 | 1.418564 | 2.857353 |
| C | -3.6919  | 2.039825 | -1.93658 | C | 3.284282 | 3.327909 | 0.225294 |
| H | -4.42903 | 1.565583 | -2.57907 | H | 3.668264 | 4.077501 | -0.4612  |
| C | 7.316086 | -2.15601 | 0.453003 | C | -7.04374 | -2.5587  | -0.74912 |
| H | 8.026689 | -1.68728 | 1.129624 | H | -7.61415 | -2.26674 | -1.62772 |
| C | -5.29271 | 3.976253 | -1.60655 | C | 5.583616 | 3.201408 | 1.296423 |
| H | -5.18408 | 4.729861 | -2.39778 | H | 6.210871 | 2.410816 | 0.863515 |
| H | -5.65207 | 4.493372 | -0.71042 | H | 5.776013 | 4.128007 | 0.746643 |
| H | -6.06345 | 3.268571 | -1.92922 | H | 5.897975 | 3.34459  | 2.336659 |
| C | 5.494109 | -3.34206 | -1.28911 | C | -5.5699  | -3.30906 | 1.492353 |
| H | 4.756846 | -3.81631 | -1.93096 | H | -4.97018 | -3.61603 | 2.344775 |
| C | 7.619325 | -3.37574 | -0.1514  | C | -7.47797 | -3.61415 | 0.052014 |
| H | 8.56549  | -3.86144 | 0.070093 | H | -8.39039 | -4.14269 | -0.20941 |
| C | 6.708994 | -3.97494 | -1.02769 | C | -6.73851 | -3.99975 | 1.17484  |
| H | 6.933993 | -4.93292 | -1.48657 | H | -7.06071 | -4.83661 | 1.786937 |

**Table S11** S<sub>0</sub> optimized geometry of the compound **6c** at B3LYP/6-31g (d,p)

| Atom | X        | Y        | Z        | Atom | X        | Y        | Z        |
|------|----------|----------|----------|------|----------|----------|----------|
| O    | 6.474062 | 1.112039 | 0.407185 | C    | -6.80497 | -0.6138  | -1.23961 |
| N    | 2.396194 | -1.19865 | 0.07498  | C    | -7.56856 | 1.569685 | -0.50252 |
| N    | 5.190475 | -1.10844 | -0.36451 | C    | -8.1223  | -0.9867  | -1.51157 |
| C    | 1.114651 | -1.52359 | 0.44216  | C    | -9.15678 | -0.07957 | -1.28201 |
| C    | -0.0106  | -0.61344 | 0.559969 | C    | 4.942179 | 3.922464 | 0.32519  |
| C    | -1.31448 | -1.29839 | 0.814121 | C    | -8.88299 | 1.19664  | -0.7736  |
| C    | 1.098701 | -2.91866 | 0.640394 | H    | 5.545111 | 0.808591 | 0.408893 |
| C    | -1.92376 | -2.09216 | -0.17036 | H    | 2.747229 | -0.27555 | -0.12844 |
| C    | 2.386111 | -3.41139 | 0.386879 | H    | 0.227979 | -3.48406 | 0.935352 |
| C    | -3.88773 | -2.40336 | 1.238338 | H    | -1.40553 | -2.26256 | -1.1092  |
| C    | 4.590623 | -2.24628 | -0.23013 | H    | 2.723014 | -4.43672 | 0.45661  |
| C    | 3.188632 | -2.31928 | 0.043978 | H    | 5.122182 | -3.20283 | -0.29001 |
| C    | -3.25963 | -1.63619 | 2.228297 | H    | -3.77836 | -1.45354 | 3.165576 |
| C    | -1.99395 | -1.09031 | 2.021873 | H    | -1.53556 | -0.46673 | 2.783271 |
| C    | -3.19671 | -2.62665 | 0.036848 | H    | -3.66956 | -3.21383 | -0.74576 |
| C    | 6.556609 | -1.04049 | -0.65455 | H    | 6.823234 | -2.91201 | -1.68531 |
| C    | 7.190019 | 0.15772  | -0.24369 | H    | 9.010482 | 1.282192 | -0.14706 |
| C    | 7.314937 | -2.01205 | -1.3275  | H    | 10.34612 | -0.4674  | -1.32552 |
| C    | 8.55053  | 0.357418 | -0.48025 | H    | -5.19534 | -4.06024 | 1.686764 |
| C    | 9.28871  | -0.62842 | -1.13753 | H    | -5.77084 | -2.49711 | 2.289471 |
| C    | -5.26058 | -2.98899 | 1.455397 | H    | -5.86932 | -2.87711 | 0.553472 |
| C    | 8.673569 | -1.81061 | -1.56636 | H    | 9.24752  | -2.56436 | -2.09644 |
| O    | -5.79945 | -1.50088 | -1.46089 | H    | -4.9847  | -1.06205 | -1.14465 |
| N    | -2.40823 | 1.204199 | 0.029514 | H    | -2.7109  | 0.255452 | -0.12734 |
| N    | -5.14781 | 0.905295 | -0.50675 | H    | -0.35786 | 3.642803 | 0.73519  |
| C    | -1.13713 | 1.615924 | 0.337138 | H    | 1.970428 | 0.911327 | 2.358668 |

|   |          |          |          |   |          |          |          |
|---|----------|----------|----------|---|----------|----------|----------|
| C | 0.037775 | 0.758519 | 0.44278  | H | -2.9277  | 4.421529 | 0.343046 |
| C | 1.322199 | 1.518959 | 0.398373 | H | -5.28134 | 2.989617 | -0.2657  |
| C | -1.20222 | 3.014762 | 0.494119 | H | 3.0441   | 3.669034 | -1.61648 |
| C | 2.208149 | 1.513937 | 1.48728  | H | 0.968263 | 2.320929 | -1.56647 |
| C | -2.53032 | 3.417024 | 0.28893  | H | 4.042731 | 2.272478 | 2.317225 |
| C | 3.695323 | 3.073586 | 0.346892 | H | -7.36159 | 2.550857 | -0.08612 |
| C | -4.66672 | 2.083101 | -0.27086 | H | -8.31601 | -1.98218 | -1.89792 |
| C | -3.27308 | 2.266669 | -8.5E-05 | H | -10.1814 | -0.37251 | -1.49133 |
| C | 2.815938 | 3.061653 | -0.74461 | H | 5.166283 | 4.313941 | 1.323318 |
| C | 1.648662 | 2.30082  | -0.72088 | H | 4.82776  | 4.766325 | -0.36286 |
| C | 3.377958 | 2.274964 | 1.457078 | H | 5.805904 | 3.32953  | 0.005428 |
| C | -6.50719 | 0.679306 | -0.73953 | H | -9.6932  | 1.893042 | -0.58091 |

**Table S12**  $S_0$  optimized geometry of the compound **6c**+TFA at B3LYP/6-31g (d,p)

| Atom | X        | Y        | Z        | Atom | X        | Y        | Z        |
|------|----------|----------|----------|------|----------|----------|----------|
| O    | 5.938468 | 0.361605 | -0.801   | H    | -4.42214 | 0.389117 | -0.09719 |
| H    | 6.358985 | -0.60464 | -0.71531 | N    | -6.71159 | -1.25777 | -0.05563 |
| N    | 1.801732 | 1.957559 | -0.1235  | H    | -6.45994 | -0.43421 | 0.475282 |
| H    | 2.281628 | 1.176715 | 0.300728 | C    | -2.52242 | 2.034113 | -0.06895 |
| N    | 4.624032 | 2.487009 | -0.21737 | C    | -5.71385 | -2.06361 | -0.52118 |
| H    | 4.335927 | 1.521716 | -0.37745 | H    | -5.99152 | -3.06195 | -0.83201 |
| C    | 0.402554 | -0.46207 | 0.203458 | C    | -4.38926 | -1.69307 | -0.58394 |
| C    | 3.717506 | 3.464389 | -0.3239  | C    | -2.50082 | -0.41333 | -0.41917 |
| H    | 4.080339 | 4.482854 | -0.40129 | C    | -8.08161 | -1.52598 | -0.10632 |
| C    | 2.352687 | 3.204321 | -0.36675 | C    | -1.74682 | 0.771708 | -0.22887 |
| C    | 0.441821 | 1.958355 | -0.35142 | C    | -8.93542 | -0.71443 | 0.673574 |
| C    | 6.011586 | 2.570345 | -0.05284 | C    | -2.38168 | 2.805394 | 1.09597  |
| C    | -0.33711 | 0.779956 | -0.15877 | H    | -1.69938 | 2.467133 | 1.86965  |
| C    | 6.693881 | 1.357461 | -0.33942 | C    | -2.12791 | -1.73548 | -0.83206 |
| C    | 0.069217 | -1.13686 | 1.388256 | H    | -1.11629 | -2.05119 | -1.03031 |
| H    | -0.73948 | -0.75198 | 2.0021   | C    | -8.64256 | -2.54197 | -0.89016 |
| C    | 0.124059 | 3.285679 | -0.78627 | H    | -8.00412 | -3.14722 | -1.52385 |
| H    | -0.85659 | 3.623203 | -1.07852 | C    | -3.3968  | 2.490367 | -1.06781 |
| C    | 6.696191 | 3.703242 | 0.389478 | H    | -3.50598 | 1.912509 | -1.98122 |
| H    | 6.149647 | 4.611744 | 0.624933 | C    | -10.3089 | -0.93345 | 0.673787 |
| C    | 1.449202 | -0.98023 | -0.58254 | H    | -10.9462 | -0.29836 | 1.284421 |
| H    | 1.717429 | -0.47884 | -1.50841 | C    | -3.08329 | 3.997318 | 1.249873 |
| C    | 8.078817 | 1.304474 | -0.13635 | H    | -2.95629 | 4.583075 | 2.156814 |
| H    | 8.598217 | 0.372587 | -0.33462 | C    | -3.2634  | -2.49974 | -0.93941 |
| C    | 0.75667  | -2.28488 | 1.771908 | H    | -3.32668 | -3.53976 | -1.23031 |
| H    | 0.487678 | -2.78849 | 2.696982 | C    | -10.0215 | -2.76313 | -0.87895 |
| C    | 1.278844 | 4.040508 | -0.77447 | H    | -10.4381 | -3.55581 | -1.49177 |
| H    | 1.384513 | 5.07583  | -1.06971 | C    | -3.95135 | 4.461126 | 0.249261 |
| C    | 8.08052  | 3.639753 | 0.557092 | C    | -10.8567 | -1.96318 | -0.09922 |

|   |          |          |          |   |          |          |          |
|---|----------|----------|----------|---|----------|----------|----------|
| H | 8.622296 | 4.514066 | 0.903038 | H | -11.929  | -2.12852 | -0.09148 |
| C | 1.805368 | -2.79813 | 0.996618 | C | -4.09576 | 3.688726 | -0.91012 |
| C | 8.760336 | 2.441339 | 0.303946 | H | -4.75446 | 4.035607 | -1.70219 |
| H | 9.835129 | 2.391267 | 0.452344 | C | -4.72342 | 5.744811 | 0.431055 |
| C | 2.140016 | -2.12615 | -0.18952 | H | -5.62366 | 5.57865  | 1.037544 |
| H | 2.953242 | -2.50874 | -0.79752 | H | -4.11989 | 6.499589 | 0.946597 |
| C | 2.588653 | -4.00385 | 1.440476 | H | -5.04399 | 6.15443  | -0.53209 |
| H | 3.592072 | -3.69053 | 1.746167 | O | 5.255515 | -2.12093 | 1.045331 |
| H | 2.094452 | -4.51265 | 2.274796 | O | 6.722778 | -1.97546 | -0.68412 |
| H | 2.723084 | -4.71418 | 0.618826 | F | 5.648735 | -4.81751 | 0.992735 |
| O | -8.32152 | 0.271072 | 1.404335 | F | 4.721548 | -4.3208  | -0.91854 |
| H | -8.98419 | 0.777256 | 1.892344 | F | 6.875436 | -4.6357  | -0.7901  |
| N | -3.87781 | -0.44264 | -0.26447 | C | 5.95448  | -2.57418 | 0.134558 |
|   |          |          |          | C | 5.824085 | -4.10195 | -0.13988 |

**Table S13** S<sub>0</sub> optimized geometry of the compound **6c**+HCl at B3LYP/6-31g (d,p)

| Atom | X        | Y        | Z        | Atom | X        | Y        | Z        |
|------|----------|----------|----------|------|----------|----------|----------|
| O    | 6.194574 | -1.0212  | -0.0795  | O    | -7.60494 | 0.620853 | 1.574323 |
| H    | 6.517685 | -1.98254 | 0.064324 | H    | -8.18979 | 1.195487 | 2.085505 |
| N    | 2.53718  | 1.264713 | -0.20432 | N    | -3.33657 | -0.54923 | -0.27587 |
| H    | 2.909662 | 0.415438 | 0.193006 | H    | -3.78087 | 0.334527 | -0.08154 |
| N    | 5.370738 | 1.404542 | -0.18655 | N    | -6.2299  | -1.05295 | 0.034657 |
| H    | 4.918412 | 0.49381  | -0.2323  | H    | -5.86987 | -0.26419 | 0.555862 |
| C    | 0.976615 | -1.00116 | -0.09818 | C    | -1.73186 | 1.768826 | -0.10347 |
| C    | 4.627162 | 2.503799 | -0.35933 | C    | -5.34537 | -1.95992 | -0.46942 |
| H    | 5.135739 | 3.455071 | -0.45699 | H    | -5.74317 | -2.91894 | -0.77359 |
| C    | 3.239001 | 2.435316 | -0.42613 | C    | -3.9899  | -1.73532 | -0.57906 |
| C    | 1.190586 | 1.42806  | -0.43857 | C    | -1.97121 | -0.66548 | -0.48256 |
| C    | 6.74995  | 1.248453 | -0.00614 | C    | -7.62254 | -1.16634 | 0.032966 |
| C    | 0.305353 | 0.315779 | -0.30561 | C    | -1.0944  | 0.436608 | -0.31045 |
| C    | 7.167791 | -0.10701 | 0.059483 | C    | -8.35082 | -0.27812 | 0.855207 |
| C    | 0.773635 | -1.72239 | 1.086896 | C    | -1.49593 | 2.491363 | 1.077145 |
| H    | 0.063262 | -1.34787 | 1.818011 | H    | -0.84545 | 2.064026 | 1.833916 |
| C    | 1.03178  | 2.795116 | -0.83185 | C    | -1.75654 | -2.01509 | -0.91329 |
| H    | 0.096335 | 3.253241 | -1.10987 | H    | -0.79383 | -2.43565 | -1.15428 |
| C    | 7.667399 | 2.293322 | 0.119885 | C    | -8.32137 | -2.09999 | -0.74223 |
| H    | 7.329573 | 3.324603 | 0.081466 | H    | -7.77773 | -2.7611  | -1.40783 |
| C    | 1.897499 | -1.50681 | -1.03474 | C    | -2.56491 | 2.337975 | -1.07862 |
| H    | 2.066918 | -0.96008 | -1.95796 | H    | -2.74644 | 1.796901 | -2.00298 |
| C    | 8.523288 | -0.39065 | 0.257299 | C    | -9.73932 | -0.34316 | 0.905249 |
| H    | 8.82884  | -1.43038 | 0.314592 | H    | -10.2781 | 0.348608 | 1.548317 |
| C    | 1.483878 | -2.89727 | 1.334809 | C    | -2.06647 | 3.745987 | 1.268678 |
| H    | 1.3271   | -3.43277 | 2.267538 | H    | -1.86826 | 4.292147 | 2.187499 |
| C    | 2.272929 | 3.40282  | -0.81612 | C    | -2.97151 | -2.65433 | -0.97899 |



|   |          |          |          |    |          |          |          |
|---|----------|----------|----------|----|----------|----------|----------|
| H | 2.500653 | 4.423758 | -1.09199 | H  | -3.15607 | -3.67963 | -1.2703  |
| C | 9.017224 | 1.994803 | 0.307649 | C  | -9.71497 | -2.16638 | -0.68136 |
| H | 9.737472 | 2.800473 | 0.406509 | H  | -10.2399 | -2.89696 | -1.28814 |
| C | 2.421874 | -3.38947 | 0.416586 | C  | -2.8926  | 4.323003 | 0.291473 |
| C | 9.435971 | 0.659692 | 0.377275 | C  | -10.4265 | -1.29199 | 0.140323 |
| H | 10.48697 | 0.432625 | 0.529527 | H  | -11.5095 | -1.33713 | 0.186744 |
| C | 2.607698 | -2.67727 | -0.7791  | C  | -3.13188 | 3.599214 | -0.88314 |
| H | 3.331988 | -3.03809 | -1.50393 | H  | -3.7604  | 4.032441 | -1.6569  |
| C | 3.235202 | -4.62606 | 0.698899 | C  | -3.51942 | 5.677353 | 0.514783 |
| H | 4.30964  | -4.39627 | 0.683392 | H  | -4.37465 | 5.605424 | 1.199481 |
| H | 2.980131 | -5.05196 | 1.674429 | H  | -2.8036  | 6.374804 | 0.963597 |
| H | 3.059301 | -5.39202 | -0.06682 | H  | -3.88007 | 6.107218 | -0.42485 |
|   |          |          |          | Cl | 7.023929 | -3.78069 | 0.340873 |

**Table S14**  $S_0$  optimized geometry of the compound **6c**+HNO<sub>3</sub> at B3LYP/6-31g (d,p)

| Atom | X        | Y        | Z        | Atom | X        | Y        | Z        |
|------|----------|----------|----------|------|----------|----------|----------|
| O    | 6.440573 | -0.55739 | -0.9308  | N    | -3.56237 | -0.47985 | -0.31012 |
| H    | 6.715665 | -1.51511 | -0.6414  | H    | -4.0075  | 0.392803 | -0.07282 |
| N    | 2.330819 | 1.334855 | -0.27998 | N    | -6.45449 | -0.99698 | -0.01928 |
| H    | 2.744697 | 0.490211 | 0.088396 | H    | -6.09361 | -0.24168 | 0.548882 |
| N    | 5.208254 | 1.63846  | -0.34888 | C    | -1.95283 | 1.830235 | -0.05676 |
| H    | 4.860657 | 0.696384 | -0.52662 | C    | -5.57113 | -1.87826 | -0.57065 |
| C    | 0.717728 | -0.95617 | -0.06719 | H    | -5.97082 | -2.8202  | -0.92233 |
| C    | 4.372462 | 2.680111 | -0.43327 | C    | -4.21682 | -1.6495  | -0.67115 |
| H    | 4.809644 | 3.670829 | -0.47822 | C    | -2.1976  | -0.58488 | -0.52557 |
| C    | 2.99227  | 2.53394  | -0.48213 | C    | -7.84701 | -1.10919 | -0.02753 |
| C    | 0.972023 | 1.476485 | -0.46895 | C    | -1.31783 | 0.506045 | -0.31123 |
| C    | 6.590458 | 1.634272 | -0.12423 | C    | -8.57502 | -0.27027 | 0.845242 |
| C    | 0.086242 | 0.37091  | -0.30805 | C    | -1.69075 | 2.522744 | 1.13654  |
| C    | 7.217938 | 0.390933 | -0.39278 | H    | -1.02097 | 2.077416 | 1.865635 |
| C    | 0.39049  | -1.68394 | 1.087148 | C    | -1.98413 | -1.91329 | -1.02247 |
| H    | -0.34661 | -1.27831 | 1.77363  | H    | -1.02074 | -2.3209  | -1.28324 |
| C    | 0.77256  | 2.846697 | -0.83562 | C    | -8.54653 | -1.9956  | -0.85573 |
| H    | -0.17878 | 3.288105 | -1.08307 | H    | -8.00314 | -2.61704 | -1.55879 |
| C    | 7.314978 | 2.717307 | 0.378457 | C    | -2.81012 | 2.423469 | -0.99658 |
| H    | 6.811838 | 3.65352  | 0.600737 | H    | -3.01112 | 1.906942 | -1.93088 |
| C    | 1.669567 | -1.50204 | -0.94805 | C    | -9.96355 | -0.33725 | 0.891535 |
| H    | 1.931531 | -0.95764 | -1.85095 | H    | -10.5022 | 0.315669 | 1.574246 |
| C    | 8.578689 | 0.246894 | -0.09828 | C    | -2.25903 | 3.770465 | 1.374224 |
| H    | 9.050788 | -0.71419 | -0.27387 | H    | -2.03998 | 4.292995 | 2.302018 |
| C    | 0.996599 | -2.90984 | 1.351744 | C    | -3.19823 | -2.54794 | -1.118   |
| H    | 0.736507 | -3.45334 | 2.256397 | H    | -3.38343 | -3.55757 | -1.45938 |
| C    | 1.994346 | 3.485809 | -0.82643 | C    | -9.94023 | -2.06492 | -0.7985  |
| H    | 2.192628 | 4.519346 | -1.07684 | H    | -10.4654 | -2.75874 | -1.44677 |

|   |          |          |          |   |          |          |          |
|---|----------|----------|----------|---|----------|----------|----------|
| C | 8.679318 | 2.566902 | 0.630129 | C | -3.10934 | 4.370835 | 0.43255  |
| H | 9.249371 | 3.402506 | 1.023181 | C | -10.6513 | -1.23965 | 0.072761 |
| C | 1.955572 | -3.45033 | 0.484209 | H | -11.7344 | -1.28697 | 0.116697 |
| C | 9.300072 | 1.332001 | 0.404942 | C | -3.37483 | 3.677346 | -0.75487 |
| H | 10.35711 | 1.2123   | 0.623534 | H | -4.02165 | 4.129392 | -1.50241 |
| C | 2.277793 | -2.72458 | -0.67272 | C | -3.73483 | 5.716535 | 0.705989 |
| H | 3.025556 | -3.11885 | -1.3541  | H | -4.59495 | 5.61924  | 1.381518 |
| C | 2.65554  | -4.74621 | 0.794851 | H | -3.02068 | 6.394079 | 1.186564 |
| H | 3.702243 | -4.54988 | 1.057022 | H | -4.08926 | 6.184026 | -0.218   |
| H | 2.171682 | -5.26793 | 1.627309 | O | 5.156972 | -2.58453 | 0.809322 |
| H | 2.656782 | -5.41153 | -0.077   | O | 7.071737 | -2.88841 | -0.21654 |
| O | -7.82836 | 0.584553 | 1.615624 | N | 6.104819 | -3.34359 | 0.51283  |
| H | -8.41227 | 1.121676 | 2.166943 | O | 6.152902 | -4.52729 | 0.889937 |

**Table S15.** Major transitions were calculated using TD-DFT studies of **6a**.

| Wavelength (nm) | Osc. Strength | Major contribs                                                     |
|-----------------|---------------|--------------------------------------------------------------------|
| 512.16206631    | 1.2385        | HOMO->LUMO (99%)                                                   |
| 394.452128443   | 0.0159        | H-1->LUMO (17%), HOMO->L+1 (82%)                                   |
| 369.06647917    | 0.0877        | H-1->LUMO (78%), HOMO->L+1 (16%)                                   |
| 351.628454374   | 0.0714        | H-2->LUMO (20%), HOMO->L+2 (76%)                                   |
| 340.092695337   | 0.4848        | H-2->LUMO (71%), HOMO->L+2 (19%)                                   |
| 317.184356244   | 0.0153        | H-3->LUMO (79%)                                                    |
| 314.369514978   | 0.0001        | HOMO->L+3 (95%)                                                    |
| 312.153359884   | 0.0348        | H-4->LUMO (78%)                                                    |
| 310.60498788    | 0.0018        | HOMO->L+4 (96%)                                                    |
| 303.964777298   | 0.1384        | H-5->LUMO (23%), H-1->L+1 (62%)                                    |
| 302.20882614    | 0.0028        | HOMO->L+5 (37%), HOMO->L+6 (42%)                                   |
| 300.087600475   | 0.1886        | H-5->LUMO (59%), H-1->L+1 (16%)                                    |
| 296.478139153   | 0.0956        | H-7->LUMO (22%), H-6->LUMO (46%)                                   |
| 293.203880746   | 0.0063        | H-8->LUMO (22%), HOMO->L+5 (28%), HOMO->L+6 (31%)                  |
| 290.633363835   | 0.0014        | H-7->LUMO (32%), H-6->LUMO (12%), HOMO->L+7 (40%)                  |
| 289.473028909   | 0.0054        | H-9->LUMO (58%), H-8->LUMO (26%)                                   |
| 283.658269492   | 0.0821        | H-12->LUMO (13%), HOMO->L+8 (55%)                                  |
| 281.347447155   | 0.0079        | H-10->LUMO (31%), H-2->L+1 (35%), H-1->L+2 (10%)                   |
| 280.051032283   | 0.0171        | H-9->LUMO (23%), H-8->LUMO (18%), HOMO->L+5 (16%)                  |
| 279.68462218    | 0.0045        | H-8->LUMO (14%), H-7->LUMO (18%), HOMO->L+7 (44%)                  |
| 276.756608434   | 0.0152        | H-10->LUMO (41%), H-2->L+1 (42%)                                   |
| 273.267490274   | 0.0091        | H-10->LUMO (13%), H-1->L+2 (80%)                                   |
| 271.871311754   | 0.0045        | H-11->LUMO (84%)                                                   |
| 266.174738111   | 0.4469        | H-12->LUMO (25%), H-3->L+1 (18%), HOMO->L+8 (14%)                  |
| 261.244849264   | 0.0137        | H-13->LUMO (14%), H-12->LUMO (12%), H-4->L+1 (20%), H-3->L+1 (27%) |
| 255.827403871   | 0.0117        | H-12->LUMO (12%), H-4->L+1 (58%), H-3->L+1 (15%)                   |
| 252.889617991   | 0.0029        | H-13->LUMO (46%), H-3->L+1 (18%), HOMO->L+9 (18%)                  |
| 250.422526787   | 0.0032        | H-5->L+1 (85%)                                                     |
| 250.068965333   | 0.0252        | H-2->L+2 (60%), H-1->L+3 (22%)                                     |

|               |        |                                                                                  |
|---------------|--------|----------------------------------------------------------------------------------|
| 248.355821105 | 0.0194 | H-6->L+1 (13%), H-2->L+2 (16%), H-1->L+3 (56%)                                   |
| 247.009987274 | 0.0178 | H-7->L+1 (18%), H-6->L+1 (39%), H-1->L+3 (10%)                                   |
| 246.401273922 | 0.004  | H-7->L+1 (13%), H-1->L+4 (62%)                                                   |
| 246.156672912 | 0.0044 | H-8->L+1 (16%), H-6->L+1 (15%), H-1->L+4 (26%), H-1->L+5 (10%)                   |
| 245.23645195  | 0.0024 | H-8->L+1 (21%), H-7->L+1 (27%), H-1->L+7 (10%)                                   |
| 242.71126013  | 0.0232 | H-9->L+1 (67%), H-8->L+1 (19%)                                                   |
| 240.942502647 | 0.0534 | H-1->L+5 (27%), H-1->L+6 (55%)                                                   |
| 239.624655519 | 0.0026 | HOMO->L+9 (57%)                                                                  |
| 238.087744623 | 0.0008 | H-5->L+2 (22%), H-2->L+4 (27%)                                                   |
| 236.963787723 | 0.0037 | H-10->L+1 (13%), HOMO->L+10 (50%)                                                |
| 235.962608504 | 0.0044 | H-4->L+3 (13%), H-2->L+3 (22%)                                                   |
| 234.003082086 | 0.0071 | H-3->L+2 (26%), H-1->L+5 (12%), H-1->L+8 (20%)                                   |
| 233.694335983 | 0.0434 | H-10->L+1 (13%), H-4->L+2 (16%), H-3->L+2 (25%), HOMO->L+10 (10%)                |
| 233.346871082 | 0.0115 | H-10->L+1 (56%)                                                                  |
| 231.331056445 | 0.0111 | H-11->L+1 (20%), H-4->L+2 (42%)                                                  |
| 230.608200677 | 0.0432 | H-11->L+1 (24%), H-9->L+1 (10%), H-8->L+1 (14%), H-1->L+5 (16%), H-1->L+8 (14%)  |
| 230.209987582 | 0.0411 | H-7->L+1 (16%), H-1->L+7 (50%)                                                   |
| 229.532347845 | 0.024  | H-12->L+1 (14%), H-11->L+1 (25%), H-4->L+2 (13%), H-1->L+8 (15%)                 |
| 226.314604651 | 0.0073 | H-12->L+1 (10%), H-11->L+1 (14%), H-7->L+2 (11%), H-6->L+2 (21%), H-1->L+8 (12%) |
| 224.637531956 | 0.0636 | H-5->L+2 (39%), H-2->L+4 (28%)                                                   |
| 222.804810704 | 0.004  | H-12->L+1 (36%), H-7->L+2 (11%), H-6->L+2 (14%)                                  |

**Table S16.** Major transitions were calculated using TD-DFT studies of **6b**.

| Wavelength (nm) | Osc. Strength | Major contribs                                    |
|-----------------|---------------|---------------------------------------------------|
| 497.3492        | 1.3565        | HOMO->LUMO (97%)                                  |
| 435.0781        | 0             | H-1->LUMO (96%)                                   |
| 385.0321        | 0.3356        | H-2->LUMO (96%)                                   |
| 378.7165        | 0             | HOMO->L+1 (94%)                                   |
| 341.432         | 0.1095        | H-1->L+1 (93%)                                    |
| 329.1499        | 0             | H-3->LUMO (88%)                                   |
| 312.3578        | 0             | H-2->L+1 (88%)                                    |
| 312.1062        | 0.006         | H-4->LUMO (77%)                                   |
| 310.5039        | 0             | HOMO->L+3 (92%)                                   |
| 306.3153        | 0.0435        | HOMO->L+2 (48%), HOMO->L+5 (43%)                  |
| 305.4625        | 0             | H-5->LUMO (88%)                                   |
| 303.2659        | 0             | HOMO->L+4 (83%)                                   |
| 299.4209        | 0.0061        | H-6->LUMO (93%)                                   |
| 296.9539        | 0             | H-7->LUMO (76%)                                   |
| 296.9112        | 0.0104        | HOMO->L+5 (12%), HOMO->L+6 (79%)                  |
| 293.6135        | 0.094         | HOMO->L+2 (30%), HOMO->L+5 (37%), HOMO->L+6 (15%) |
| 281.5647        | 0.0261        | H-8->LUMO (84%)                                   |
| 277.4751        | 0             | H-9->LUMO (76%), H-1->L+2 (18%)                   |
| 275.6613        | 0             | H-9->LUMO (14%), H-1->L+2 (70%)                   |

|          |        |                                                                    |
|----------|--------|--------------------------------------------------------------------|
| 274.2467 | 0.0009 | H-1->L+3 (89%)                                                     |
| 273.2916 | 0.121  | H-3->L+1 (70%)                                                     |
| 270.832  | 0.0043 | H-1->L+4 (86%)                                                     |
| 269.971  | 0      | H-10->LUMO (22%), H-1->L+5 (65%)                                   |
| 267.3341 | 0      | H-10->LUMO (55%), H-1->L+5 (23%)                                   |
| 264.9461 | 0      | H-2->L+3 (14%), H-1->L+6 (74%)                                     |
| 262.4837 | 0.0116 | H-12->LUMO (14%), H-11->LUMO (67%)                                 |
| 260.8711 | 0.2725 | H-12->LUMO (31%), H-11->LUMO (12%), H-3->L+1 (11%), H-2->L+2 (22%) |
| 259.0939 | 0      | H-10->LUMO (10%), H-7->LUMO (11%), H-4->L+1 (53%)                  |
| 255.9383 | 0      | H-13->LUMO (12%), H-2->L+3 (45%), HOMO->L+7 (21%)                  |
| 255.5216 | 0.223  | H-12->LUMO (10%), H-2->L+2 (30%), HOMO->L+8 (21%)                  |
| 255.0643 | 0      | H-13->LUMO (12%), H-2->L+3 (32%), H-1->L+6 (14%), HOMO->L+7 (26%)  |
| 254.7341 | 0.0767 | H-2->L+2 (25%), H-2->L+5 (25%), HOMO->L+8 (26%)                    |
| 252.5085 | 0      | H-2->L+4 (78%)                                                     |
| 250.701  | 0.0449 | H-5->L+1 (50%), H-2->L+5 (34%)                                     |
| 250.2305 | 0.0383 | H-5->L+1 (30%), H-2->L+5 (31%), HOMO->L+8 (18%)                    |
| 247.8593 | 0      | H-6->L+1 (89%)                                                     |
| 247.0248 | 0.0083 | H-2->L+6 (88%)                                                     |
| 245.5667 | 0      | H-13->LUMO (32%), H-4->L+1 (26%), HOMO->L+7 (23%)                  |
| 243.1063 | 0.0199 | H-12->LUMO (15%), H-7->L+1 (58%), HOMO->L+8 (15%)                  |
| 236.5614 | 0      | H-8->L+1 (88%)                                                     |
| 234.4899 | 0.0728 | H-1->L+7 (53%), HOMO->L+8 (10%)                                    |
| 233.9633 | 0      | H-2->L+7 (10%), H-1->L+8 (50%)                                     |
| 233.6899 | 0.0601 | H-9->L+1 (85%)                                                     |
| 232.2671 | 0      | HOMO->L+9 (82%)                                                    |
| 231.6509 | 0.033  | H-3->L+4 (24%), HOMO->L+10 (34%)                                   |
| 231.2491 | 0      | H-3->L+2 (37%), H-3->L+5 (20%)                                     |
| 230.6382 | 0.0152 | H-3->L+3 (70%), HOMO->L+10 (11%)                                   |
| 230.21   | 0.0104 | H-3->L+3 (20%), H-3->L+4 (20%), HOMO->L+10 (16%)                   |
| 228.673  | 0      | H-5->L+5 (10%), H-3->L+2 (35%)                                     |
| 226.0753 | 0.0169 | H-10->L+1 (79%)                                                    |

**Table S17.** Major transitions were calculated using TD-DFT studies of **6c**.

| Wavelength (nm) | Osc. Strength | Major contribs                   |
|-----------------|---------------|----------------------------------|
| 538.312751877   | 1.3392        | HOMO->LUMO (99%)                 |
| 417.160233546   | 0.0018        | H-1->LUMO (63%), HOMO->L+1 (36%) |
| 400.284732396   | 0.0624        | H-1->LUMO (34%), HOMO->L+1 (61%) |
| 369.06647917    | 0.0705        | H-2->LUMO (91%)                  |
| 348.573738402   | 0.2508        | HOMO->L+2 (87%)                  |
| 335.038083047   | 0.0177        | H-3->LUMO (91%)                  |
| 330.633331588   | 0.0468        | H-4->LUMO (27%), H-1->L+1 (68%)  |
| 325.956813135   | 0.476         | H-4->LUMO (59%), H-1->L+1 (25%)  |
| 318.676278754   | 0.0011        | HOMO->L+3 (94%)                  |

|               |        |                                                                                    |
|---------------|--------|------------------------------------------------------------------------------------|
| 315.915489508 | 0.0034 | HOMO->L+4 (94%)                                                                    |
| 311.299068525 | 0.026  | H-5->LUMO (56%), HOMO->L+5 (25%)                                                   |
| 307.058777087 | 0.0331 | H-5->LUMO (19%), HOMO->L+5 (53%), HOMO->L+6 (10%)                                  |
| 304.786727826 | 0.005  | H-6->LUMO (63%), HOMO->L+5 (13%)                                                   |
| 302.481624368 | 0.0079 | H-7->LUMO (22%), H-2->L+1 (60%)                                                    |
| 301.650024359 | 0.0204 | H-7->LUMO (61%), H-2->L+1 (26%)                                                    |
| 292.091768587 | 0.0101 | H-8->LUMO (80%)                                                                    |
| 290.851536577 | 0.0102 | H-9->LUMO (71%), H-1->L+2 (12%)                                                    |
| 287.779850549 | 0.1016 | H-12->LUMO (14%), HOMO->L+6 (51%)                                                  |
| 285.987574129 | 0.0041 | H-9->LUMO (10%), H-1->L+2 (77%)                                                    |
| 279.564799685 | 0.0182 | H-12->LUMO (20%), H-10->LUMO (45%)                                                 |
| 277.9852313   | 0.0734 | H-11->LUMO (13%), H-3->L+1 (65%)                                                   |
| 274.331658396 | 0.0077 | H-11->LUMO (57%), H-10->LUMO (11%)                                                 |
| 271.228983663 | 0.2192 | H-11->LUMO (19%), H-10->LUMO (19%), H-4->L+1 (16%), H-3->L+1 (10%)                 |
| 269.753694383 | 0.0389 | H-12->LUMO (14%), H-4->L+1 (61%), HOMO->L+7 (10%)                                  |
| 264.155856938 | 0.0526 | H-2->L+2 (59%)                                                                     |
| 262.86215577  | 0.0067 | H-13->LUMO (25%), H-2->L+2 (10%), H-1->L+3 (15%), HOMO->L+7 (15%), HOMO->L+8 (10%) |
| 262.161827358 | 0.0066 | H-5->L+1 (12%), H-1->L+3 (49%), HOMO->L+8 (10%)                                    |
| 261.514855541 | 0.0007 | H-1->L+3 (27%), HOMO->L+7 (39%)                                                    |
| 259.995791331 | 0.0065 | H-1->L+4 (83%)                                                                     |
| 259.007276133 | 0.0873 | HOMO->L+8 (56%)                                                                    |
| 256.749208971 | 0.0199 | H-6->L+1 (27%), H-5->L+1 (45%)                                                     |
| 253.235688342 | 0.0526 | H-1->L+5 (79%)                                                                     |
| 252.49306169  | 0.0045 | H-7->L+1 (57%), H-6->L+1 (20%)                                                     |
| 250.84812247  | 0.0059 | H-13->LUMO (11%), H-7->L+1 (29%), H-6->L+1 (24%), H-5->L+1 (12%)                   |
| 246.151785845 | 0.0023 | H-3->L+2 (22%), H-1->L+6 (51%)                                                     |
| 245.382059121 | 0.0394 | H-9->L+1 (33%), H-8->L+1 (48%)                                                     |
| 244.347161097 | 0.0037 | H-3->L+2 (61%), H-1->L+6 (18%)                                                     |
| 243.77065534  | 0.0069 | H-9->L+1 (49%), H-8->L+1 (30%)                                                     |
| 242.450219039 | 0.0069 | H-2->L+3 (68%)                                                                     |
| 241.722282251 | 0.0049 | H-2->L+4 (60%)                                                                     |
| 237.699756542 | 0.1022 | H-4->L+2 (81%)                                                                     |
| 236.611055367 | 0.0046 | H-10->L+1 (15%), HOMO->L+9 (40%), HOMO->L+10 (23%)                                 |
| 235.317706142 | 0.0076 | H-10->L+1 (21%), H-2->L+5 (10%), HOMO->L+9 (30%), HOMO->L+10 (18%)                 |
| 233.202033277 | 0.0088 | H-11->L+1 (15%), H-2->L+5 (51%)                                                    |
| 232.94352844  | 0.0003 | H-11->L+1 (55%)                                                                    |
| 232.175788866 | 0.0416 | H-2->L+6 (23%), H-1->L+7 (10%)                                                     |
| 231.798147271 | 0.0094 | H-11->L+1 (12%), H-7->L+2 (22%), H-2->L+4 (13%)                                    |
| 231.434691653 | 0.0017 | H-10->L+1 (15%), H-2->L+6 (14%), HOMO->L+10 (18%)                                  |
| 230.496733616 | 0.0021 | H-8->L+2 (14%), H-4->L+3 (14%)                                                     |
| 228.348668433 | 0.0086 | H-12->L+1 (22%), H-5->L+2 (25%), H-2->L+6 (12%)                                    |

## References:

[1] M. Fischer, J. Georges, *Chem. Phys. Lett.* 1996, **260**, 115–118.

[2] S. Uchiyama, Y. Matsumura, A. P. de Silva, K. Iwai, *Anal. Chem.* 2004, **76**, 1793–1798.

- [3] J. R. Lakowicz, B. R. Masters, *J. Biomed. Opt.* 2008, **13**, 029901.
- [4] L. J. Bourhis, O. V. Dolomanov, R. J. Gildea, J. A. K. Howard, H. Puschmann, *Acta Crystallogr. A Found. Adv.* 2015, **71**, 59–75.
- [5] O. V. Dolomanov, L. J. Bourhis, R. J. Gildea, J. A. K. Howard, H. Puschmann, *J. Appl. Crystallogr.* 2009, **42**, 339–341.
- [6] S. Gilb, K. Jacobsen, D. Schooss, F. Furche, R. Ahlrichs, M. M. Kappes, *J. Chem. Phys.* 2004, **121**, 4619–4627.
- [7] M.J. Turner, J.J. McKinnon, S.K. Wolff, D.J. Grimwood, P.R. Spackman, D. Jayatilaka, M.A. Spackman, CrystalExplorer17, University of Western Australia, 2017. <http://hirshfeldsurface.net>.
- [8] M. Yu, Y. Zhang, Y.-Q. Pan, L. Wang, *Inorganica Chim. Acta*, 2020, **509**, 119701.

--00--
